1 **Disentangling the biological information encoded in disordered**  
2 **mitochondrial morphology through its rapid elicitation by iCMM**

3  
4 Takafumi Miyamoto<sup>1\*</sup>, Hideki Uosaki<sup>2</sup>, Yuhei Mizunoe<sup>1</sup>, Satoi Goto<sup>1</sup>, Daisuke Yamanaka<sup>3</sup>,  
5 Masato Masuda<sup>4</sup>, Yosuke Yoneyama<sup>5</sup>, Hideki Nakamura<sup>6,7</sup>, Naoko Hattori<sup>8</sup>, Yoshinori Takeuchi<sup>1</sup>,  
6 Motohiro Sekiya<sup>1</sup>, Takashi Matsuzaka<sup>1</sup>, Fumihiko Hakuno<sup>4</sup>, Shin-Ichiro Takahashi<sup>4</sup>, Naoya  
7 Yahagi<sup>1</sup>, Koichi Ito<sup>3</sup> & Hitoshi Shimano<sup>1</sup>

8  
9 <sup>1</sup>Department of Internal Medicine (Endocrinology and Metabolism), Faculty of Medicine,  
10 University of Tsukuba, Ibaraki, Japan

11 <sup>2</sup>Division of Regenerative Medicine, Center for Molecular Medicine, Jichi Medical University,  
12 Tochigi, Japan

13 <sup>3</sup>Department of Veterinary Medical Sciences, Graduate School of Agriculture and Life Sciences,  
14 The University of Tokyo, Tokyo, Japan

15 <sup>4</sup>Departments of Animal Sciences and Applied Biological Chemistry, Graduate School of  
16 Agriculture and Life Sciences, The University of Tokyo, Tokyo, Japan

17 <sup>5</sup>Institute of Research, Division of Advanced Research, Tokyo Medical and Dental University  
18 (TMDU), Tokyo, Japan

19 <sup>6</sup>Johns Hopkins University School of Medicine, Department of Cell Biology and Center for Cell  
20 Dynamics, MD, 21205, USA

21 <sup>7</sup>Kyoto University Graduate School of Engineering, Department of Synthetic Chemistry and  
22 Biological Chemistry, Katsura Int'tech Center, Graduate School of Engineering, Kyoto University,  
23 Kyoto, Japan

24 <sup>8</sup>Division of Epigenomics, National Cancer Center Research Institute, Tokyo, Japan

25  
26 \*Correspondence to: [takmi565@md.tsukuba.ac.jp](mailto:takmi565@md.tsukuba.ac.jp)

27  
28  
29  
30

1 **Abstract**

2 Mitochondrial morphology is dynamically changed in conjunction with spatiotemporal  
3 functionality. Although considerable efforts have been made to understand why abnormal  
4 mitochondrial morphology occurs in various diseases, the biological significance of  
5 mitochondrial morphology in states of health and disease remains to be elucidated owing to  
6 technical limitations. In the present study, we developed a novel method, termed inducible  
7 Counter Mitochondrial Morphology (iCMM), to purposely manipulate mitochondrial  
8 morphological patterns on a minutes timescale, using a chemically inducible dimerization system.  
9 Using iCMM, we showed that mitochondrial morphological changes rapidly lead to the  
10 characteristic reconstitution of various biological information, which is difficult to investigate by  
11 conventional genetic engineering. The manipulation of mitochondrial morphology using iCMM  
12 can improve our understanding of the interplay between mitochondrial morphology and cellular  
13 functions.

14

15

16

17

18

19

20

21

22

23

24

25

## 1 Introduction

2 Mitochondria are organelles in eukaryotic cells that have evolved from endosymbiotic  $\alpha$ -  
3 proteobacteria<sup>1</sup>. They perform numerous roles, and act most prominently as an energy supply  
4 machinery that generates the energy currency adenosine triphosphate (ATP) through oxidative  
5 phosphorylation<sup>2</sup>. Furthermore, mitochondria are involved in anabolic and catabolic reactions,  
6 including, but not limited to, the tricarboxylic acid cycle,  $\beta$ -oxidation of fatty acids, and heme  
7 biosynthesis. The products of those reactions are used in various cellular processes, including as  
8 building blocks of cellular structure, as substrates in chemical reactions, and as molecular cues  
9 in signal transduction networks, indicating that mitochondria are unequivocally indispensable to  
10 cells.

11 As their name implies (Greek mitos = thread; chondrion = granule), mitochondria are highly  
12 dynamic organelles that can alter their size, shape, and subcellular distribution through  
13 repetitive, coordinated fusion and fission cycles over the course of a few minutes,<sup>3,4</sup> a  
14 phenomenon termed mitochondrial dynamics. Mitochondrial functions have to be coordinated  
15 with mitochondrial dynamics, as the latter potentially define the distribution pattern of  
16 mitochondrial deliverables, as well as the pattern of inter-organelle communication, in a time-  
17 dependent fashion<sup>5,6</sup>. Thus, the spatiotemporal dynamics of mitochondrial morphology are  
18 considered an input signal that determines how appropriately mitochondria-involving cell  
19 functions are executed under certain conditions. Disturbances in mitochondrial dynamics  
20 followed by disruption of mitochondrial morphology occur in various diseases, including cancer  
21 and metabolic diseases<sup>7,8</sup>, attesting to the pivotal role of mitochondrial morphology in  
22 physiopathology. However, the molecular mechanism underlying the relationship between  
23 mitochondrial morphology and cellular functions in health and disease remains unclear.

24 Over recent decades, considerable efforts have been made to elucidate the biological

1 information encoded in mitochondrial morphology. Generally, mitochondrial morphology was  
2 altered either chemically or by manipulating genes involved in mitochondrial morphology<sup>5,9-11</sup>.  
3 However, these approaches induced mitochondrial dysfunction and exerted adverse effects on  
4 cells because of prolonged arrest of mitochondrial dynamics<sup>12-16</sup>. To overcome this drawback, a  
5 tool for inducible, rapid, and specific manipulation of mitochondrial morphology without  
6 abrogating mitochondrial functions is required<sup>5</sup>.

7 Chemically inducible dimerization (CID) systems allow target protein manipulation in a  
8 spatiotemporally confined subcellular compartment through a small molecule-induced ternary  
9 complex formation of two different proteins<sup>17</sup>. CID systems are applicable to protein-based  
10 biocomputing devices for controlling cellular functions<sup>17-20</sup>. Compared to genetic circuit-based  
11 biocomputing devices that require a long time (i.e., hours) to execute the logic function, CID  
12 systems allow for faster-processing biocomputing devices (seconds to minutes)<sup>18</sup>. Therefore,  
13 they are suitable for inducing morphological changes in mitochondria over a short period of time.  
14 CID systems have been widely applied in mitochondrial studies, e.g., to promote mitochondria–  
15 endoplasmic reticulum (ER) interaction<sup>21</sup> and to suppress kinase activity in mitochondria<sup>22</sup>.  
16 However, a sophisticated platform for manipulating mitochondrial morphology into various  
17 patterns using CID systems is lacking.

18 In the present study, we developed "inducible Counter Mitochondrial Morphology" ("iCMM"),  
19 a CID system that utilizes a YES Boolean logic gate, to manipulate mitochondrial morphology in  
20 living cells on a minutes timescale. As mitochondrial morphology varies among cell types and  
21 conditions, we developed three iCMM systems, each capable of inducing different morphologies.  
22 Using iCMM, we determined the type of change occurring immediately following the  
23 mitochondrial morphology change, which would otherwise be difficult to study.

24

## 1 **Results**

### 2 **Development of iCMM**

3 iCMM, a YES Boolean logic gate, consists of an effector (i.e., a designed protein) to perturb  
4 mitochondrial morphology and a mitochondria-specific anchor protein that tethers the effector  
5 to the mitochondria in the presence of a chemical dimerizer (Fig. 1a). We adopted a rapamycin-  
6 based CID system<sup>17</sup>, whereby peptidyl-prolyl cis-trans isomerase FKBP1A (termed FKBP) and the  
7 FKBP12-rapamycin binding domain in mammalian/mechanistic target of rapamycin (termed FRB)  
8 were served as an effector and an anchor, respectively, using rapamycin as a chemical dimerizer  
9 (Fig. 1b).

10 We first used a reported fundamental fusion protein consisting of enhanced yellow  
11 fluorescent protein (EYFP) and FKBP (termed YF)<sup>23</sup> as a functional iCMM effector (Fig. 1b).  
12 Although YF has been used as a control effector in various experimental settings<sup>23,24</sup>, we found  
13 that once the diffusive YF was substantially translocated to the outer surfaces of mitochondria,  
14 which was circumscribed by anchor proteins—which consisted of mitochondrial targeting  
15 sequences derived from Tom20, enhanced cyan fluorescent protein (ECFP), and FRB (termed  
16 Tom20-CR)—mitochondrial morphology changed from a basal reticular thread-like structure to  
17 large punctate structures (Fig. 1c, Supplementary movie 1). This mitochondrial network  
18 disruption was confirmed as an increase in the roundness of mitochondria (Fig. 1f). Correlative  
19 light and electron microscopy (CLEM) indicated that YF translocation induced mitochondrial  
20 crowding, not fusion (Fig. 1i). mYF containing monomeric EYFP<sup>A206K</sup> (mEYFP) instead of EYFP did  
21 not change mitochondrial morphology, although it substantially accumulated in the  
22 mitochondrial outer membrane (Supplementary Fig. 1, Supplementary movie 2), suggesting that  
23 the inherent homodimerization activity of EYFP<sup>25</sup> was, at least partially, required for the YF-  
24 induced change in mitochondrial morphology. We used mYF as a reference for the functional

1 iCMM effectors in subsequent experiments.

2 We next focused on caveolin-1, an integral membrane protein that localizes to caveola and  
3 multiple interior compartments through vesicle trafficking<sup>26</sup>. As fluorescent protein-fused  
4 caveolin-1 exhibits a punctate distribution pattern in the cell<sup>27</sup>, we hypothesized that the  
5 stabilization of mitochondria with the punctate structures via the CID system could induce  
6 mitochondrial morphology change. For this concept, we constructed a functional iCMM effector  
7 consisting of YF and amino acids (aa) 61–178 of caveolin-1 (termed YF-Cav1s, Fig. 1b), which was  
8 the smallest fusion protein showing a punctate distribution pattern similar to that of fluorescent  
9 protein-fused caveolin-1 (data not shown). Following the addition of rapamycin, mitochondrial  
10 morphology changed from a network structure to punctate structures of various sizes in cells  
11 expressing YF-Cav1s and Tom20-CR (Fig. 1d, g, and j; Supplementary movie 3).

12 Lastly, we optimized a previously designed interspecies fusion protein consisting of aa 30–262  
13 of *Listeria monocytogenes* Actin assembly-inducing protein (ActA), codon-optimized for usage in  
14 mammalian cells<sup>24</sup>, and aa 2–380 of human zyxin (termed mActZ), and being structurally and  
15 functionally similar to full-length ActA<sup>28</sup>. As ActA converts actin polymerization into a motile  
16 force<sup>29</sup>, we hypothesized that the mechanical force generated by actin polymerization could alter  
17 mitochondrial morphology. mActZ was fused with FKBP and EYFP (termed mActZ-FY, Fig. 1b) to  
18 produce the functional iCMM effector. Similar to ActuA<sup>tor</sup>, a codon-optimized ActA functionally  
19 homologous to mActZ-FY<sup>24</sup>, cytosolic mActZ-FY recruitment to mitochondria by rapamycin  
20 treatment obviously transformed mitochondrial morphology to small, dot-like structures of  
21 almost equal size, in cells expressing mActZ-FY and Tom20-CR (Fig. 1e, h, and k, Supplementary  
22 movie 4).

23 Together, these results indicate that each functional iCMM effector could alter mitochondrial  
24 morphology in different ways on a minutes timescale.

1

## 2 **iCMM specifically alters mitochondrial morphology in target cells**

3 In addition to the timescale, we confirmed the specificity of iCMM; none of the functional iCMM  
4 effectors developed in the present study changed mitochondrial morphology prior to activation  
5 of the iCMM system, as judged from the average area and number of mitochondria in the cells  
6 (Supplementary Fig. 2). Notably, the average mitochondrial area and number could not be  
7 distinguished in cells expressing iCMM with YF and Tom20-CR before and after operating the  
8 iCMM system (Supplementary Fig. 2e, I). This is because YF induced mitochondrial assemblage,  
9 but not intense fragmentation, as observed for YF-Cav1s and mActZ-FY (Fig. 1). We confirmed  
10 that iCMM specifically induced mitochondrial morphology changes, without affecting the  
11 morphology of other organelles during a 120-min observation window (Supplementary Fig. 3).

12 One of the strengths of the CID system is its versatility<sup>17,30</sup>. To determine versatility, the iCMM  
13 systems were transduced into Hep G2 human liver cancer cell line and U-2 OS human  
14 osteosarcoma cell line. Each functional iCMM effector induced a characteristic mitochondrial  
15 morphology change in both cell lines, on a similar timescale (Supplementary Fig. 4).

16

## 17 **iCMM alters mitochondrial morphology without loss of mitochondrial membrane potential**

18 The mitochondrial membrane potential ( $\Delta\psi_m$ ), which results from redox transformations, plays  
19 decisive roles in various cellular functions, including ATP synthesis and innate immune  
20 responses<sup>31-33</sup>. Remarkably,  $\Delta\psi_m$  is also critical in determining mitochondrial morphology<sup>34</sup>. To  
21 resolve the biological significance of mitochondrial morphology in various cellular functions,  
22 devices capable of inducing mitochondrial morphology changes at specific times, without  
23 altering  $\Delta\psi_m$  in the target living cells, are needed. Therefore, we examined the effect of iCMM  
24 on  $\Delta\psi_m$ . Regardless of the effector used, tetramethylrhodamine ethyl ester (TMRE) staining

1 revealed that no change in  $\Delta\psi_m$  occurred before or after mitochondrial morphology change  
2 induction by iCMM, during a 120-min time window (Fig. 2a–d). We further examined whether  
3 mitochondrial morphology changes induced by iCMM altered the susceptibility of mitochondria  
4 to FCCP, an ionophore uncoupler of oxidative phosphorylation (Supplementary Fig. 5a). Time-  
5 lapse imaging revealed that FCCP treatment resulted in loss of  $\Delta\psi_m$ , irrespective of  
6 mitochondrial morphology (Fig. 2e–h; Supplementary Fig. 5b). Together, these results indicated  
7 that iCMM altered mitochondrial morphology without affecting  $\Delta\psi_m$ .

8

9 **Disruption of mitochondrial morphology by mActZ, but not other effectors, suppresses oxygen**  
10 **consumption by mitochondria**

11 In mammalian cells, mitochondria are responsible for the majority of cellular oxygen  
12 consumption to generate ATP. To maintain bioenergetic activity in this process, mitochondria  
13 repeatedly go through fusion and fission cycles,<sup>14,35,36</sup>. To examine the effect of iCMM-induced  
14 mitochondrial morphology disruption on the mitochondrial respiration capacity, we established  
15 cell lines stably expressing iCMM. Compared to control cells that stably expressed the control  
16 iCMM effector mYF and Tom20-CR (termed iCMM<sup>mYF</sup> cells), no noticeable differences in cell  
17 proliferation and cell morphology were observed in cells stably expressing Tom20-CR and a  
18 functional iCMM effector (YF, YF-Cav1s, or mActZ-FY) (termed iCMM<sup>YF</sup>, iCMM<sup>Cav1s</sup>, and iCMM<sup>mActZ</sup>,  
19 respectively) (Supplementary Fig. 6a, b). As expected, iCMM system activation had similar effects  
20 on mitochondrial morphology in the stable cell lines as in cells that transiently expressed iCMM  
21 (Supplementary Fig. 6c–f).

22 We next examined the relationship between mitochondrial morphology and mitochondrial  
23 respiration activity by measuring the oxygen consumption rate (OCR). Before OCR measurement,  
24 cells were treated with rapamycin to induce mitochondrial morphology change or with DMSO as



1 a control for 30 min. Although rapamycin can affect the OCR under certain conditions<sup>37,38</sup>, no  
2 significant difference in the OCR was observed in iCMM<sup>mYF</sup> cells treated with DMSO or rapamycin,  
3 indicating that rapamycin, at least under the current conditions, did not affect the OCR (Fig. 3a).  
4 Similarly, disruption of the mitochondrial network by YF and YF-Cav1s did not affect the OCR (Fig.  
5 3b, c). In contrast, rapamycin-treated iCMM<sup>mActZ</sup> cells exhibited had a lower OCR than did control  
6 cells (Fig. 3d). Prolonged (2 h) disruption of the mitochondrial network resulted in similar  
7 phenotypes (Supplementary Fig. 7). However, the maximal and non-mitochondrial OCR in  
8 iCMM<sup>mActZ</sup> cells varied depending on the time elapsed after mitochondrial morphology change  
9 occurrence (Fig. 3d and Supplementary Fig. 7d), implying that maximal and non-mitochondrial  
10 respiration might be reorganized to adapt to the lowered mitochondrial respiration. Although  
11 mitochondrial ATP production activity was decreased in iCMM<sup>mActZ</sup> cells, similar to the other cell  
12 lines, the overall ATP level in the cells remained unchanged, as ATP production in proliferating  
13 cells is attributed to glycolysis<sup>39</sup> (Fig. 3e–h). Together, these results suggested that the OCR  
14 fluctuated according to the mitochondrial morphology.

15

## 16 **Mitochondrial morphology affects parkin accumulation in mitochondria**

17 Mitophagy, the specific autophagic degradation of mitochondria, is at the core of mitochondrial  
18 quality control<sup>40</sup>. During this process, the E3 ubiquitin ligase parkin selectively translocates to  
19 dysfunctional mitochondria with low  $\Delta\psi_m$ <sup>40</sup>. Although mitochondria that potentially are a  
20 mitophagy substrate usually are fragmented, mitochondrial fragmentation *per se* is not sufficient  
21 to cause parkin recruitment<sup>41</sup>. These findings were made after inducing mitochondrial  
22 morphology change for an extended period; therefore, we reexamined the interplay between  
23 mitochondrial morphology and parkin translocation using iCMM, which can alter mitochondrial  
24 morphology on a minutes timescale. Cells transiently expressing iCMM were treated with

1 rapamycin for 2 h to examine whether the mitochondrial morphology change *per se* would cause  
2 parkin translocation (Supplementary Fig. 8). Parkin recruitment was observed in a small  
3 proportion of mitochondria whose morphology was altered by YF-Cav1s and mActZ-FY (Fig. 4a).  
4 Next, we tested whether mitochondrial morphology affected FCCP-induced parkin translocation,  
5 excluding cells that showed parkin translocation to mitochondria before FCCP treatment.  
6 (Supplementary Fig. 8). Compared to control cells that expressed mYF, mitochondrial  
7 fragmentation induced by YF-Cav1s and mActZ-FY did not promote parkin translocation to  
8 mitochondria in the presence of FCCP (Fig. 4b). In contrast, mitochondrial crowding induced by  
9 YF suppressed FCCP-induced parkin translocation (Fig. 4b). Time-lapse imaging revealed that the  
10 speed of parkin translocation did not differ between the various mitochondrial morphologies  
11 induced by the iCMM systems (Fig. 4c, d). Considering that FCCP treatment decreased the  $\Delta\psi_m$   
12 in an mitochondrial morphology-independent manner (Fig. 2e–h), these results implied that  
13 parkin recruitment to depolarized mitochondria might be, at least partially, regulated by  
14 mitochondrial morphology-related mechanisms.

15

## 16 **Mitochondrial morphology change does not render cells susceptible to staurosporine-induced** 17 **apoptosis**

18 During apoptosis, large intracellular structures reorganize to prepare for cell death<sup>42</sup>. One  
19 hallmark of this reorganization is mitochondrial fragmentation, caused by an imbalance in the  
20 mitochondrial fusion-fission cycles<sup>43,44</sup>. It should be noted that mitochondrial fragmentation  
21 could determine susceptibility to apoptosis-inducible input<sup>45–47</sup>. To examine whether iCMM-  
22 induced mitochondrial morphology change affected susceptibility to apoptosis induction, cells  
23 stably expressing iCMM were treated with staurosporine (STS), an apoptosis inducer. Disrupted  
24 mitochondrial morphology did not promote STS-induced caspase-3 activation (Fig. 5a). Notably,

1 rapamycin failed to attenuate mTORC1 activity in iCMM<sup>mActZ</sup> cells, whereas STS-induced  
2 suppression of mTORC1 activity<sup>48</sup> was similar to that in other cells (Fig. 5a). Torin 1, an mTOR  
3 inhibitor, completely suppressed mTORC1 activity (Supplementary Fig. 9), indicating that the  
4 mActZ-FY-induced mitochondrial morphology change attenuated the effect of rapamycin on  
5 mTORC1 signaling. Nuclear morphology analysis in cells stably or transiently expressing the  
6 iCMM systems supported that mitochondrial morphology was not involved in the sensitivity to  
7 STS-induced apoptosis (Fig. 5b, c). Collectively, these results suggested that changes in  
8 intracellular information accompanied with changes in mitochondrial morphology, rather than  
9 mitochondrial morphology *per se*, played a pivotal role in determining susceptibility to STS-  
10 induced apoptosis during the observation window.

11

### 12 **Rapid mitochondrial morphology change induced by iCMM alters the transcriptome**

13 While most mitochondrial morphology changes are triggered by changes in the cell milieu, a  
14 comprehensive understanding of how mitochondrial morphology changes alter intracellular  
15 information is lacking. Although we developed the iCMM system to disentangle  
16 physiopathological information embedded in mitochondrial morphology, it is also applicable to  
17 the manipulation of intracellular information through mitochondrial morphology reorganization.  
18 To elucidate the effects of the iCMM systems on the gene transcription profile, HeLa cells stably  
19 expressing iCMM were subjected to transcriptome analysis at 2 h and 6 h following  
20 mitochondrial morphology change induction. After switching on the iCMM system in iCMM<sup>mYF</sup>,  
21 iCMM<sup>YF</sup>, iCMM<sup>Cav1s</sup>, and iCMM<sup>mActZ</sup> cells, the expression levels of 25, 23, 65, and 49 genes at 2 h  
22 and of 6, 42, 58, and 111 genes at 6 h, respectively, were significantly altered (Supplementary  
23 Fig. 10a). Consistent with a previous report<sup>49</sup>, rapamycin treatment increased *CREB3* regulatory  
24 factor (*CREBRF*) in all cells expressing iCMM at 2 h, highlighting the fidelity of this analysis

1 (Supplementary Table 1). For 13 genes, mRNA levels were changed in the same direction and  
2 with similar timing by all functional iCMM effectors (Supplementary Table 1). Conversely, mRNA  
3 level changes were specific for 18, 31, 68, and 111 genes in iCMM<sup>mYF</sup>, iCMM<sup>YF</sup>, iCMM<sup>Cav1s</sup>, and  
4 iCMM<sup>mActZ</sup> cells, respectively (Supplementary table 1).

5 When compared with iCMM<sup>mYF</sup> cells, 0, 26, and 53 genes at 2 h and 39, 66, and 92 genes at 6  
6 h were significantly differentially expressed after switching on the iCMM system in iCMM<sup>YF</sup>,  
7 iCMM<sup>Cav1s</sup>, and iCMM<sup>mActZ</sup> cells, respectively (Supplementary Fig. 10b). mRNA levels of six genes  
8 were changed in the same direction in all cells expressing a functional iCMM effector, whereas  
9 the expression of 20, 58, and 98 genes was specifically altered in iCMM<sup>YF</sup>, iCMM<sup>Cav1s</sup>, and  
10 iCMM<sup>mActZ</sup> cells, respectively (Supplementary Table 2). Collectively, these results indicated that  
11 the transcriptome was, at least partially, coordinated with mitochondrial morphology.

12 Gene set enrichment analysis of 50 “hallmark” gene sets representing major biological  
13 processes<sup>50,51</sup> revealed that certain gene sets, including MYC targets and oxidative  
14 phosphorylation genes, were significantly enriched upon mitochondrial morphology change in  
15 cell lines expressing a functional iCMM effector (Fig. 6a). Compared with the reference iCMM  
16 effector mYF, each functional iCMM effector exhibited a distinctive hallmark pattern  
17 (Supplementary Fig. 11a). Gene ontology (GO) analysis revealed that iCMM-induced  
18 mitochondrial morphology change led to the reorganization of various cellular functions, most  
19 notably, ribosomal functions, in a time- and functional iCMM effector-dependent manner (Fig.  
20 6b, Supplementary Fig. 11b). Regulatory target analysis showed that certain target genes,  
21 including *ELK1*, *NRF2*, and *SRF* were enriched, especially in cells expressing mActZ-FY (Fig. 6c,  
22 Supplementary Fig. 11c). These results indicated that mitochondrial morphology changes were  
23 reflected in the transcriptome within a few hours following their induction, and that they evoked  
24 various cellular functions.

1

## 2 **Rapid mitochondrial morphology change by iCMM alters the amino acid profile**

3 Of the 20 amino acids utilized for protein synthesis, 17 require mitochondrial enzymes for their  
4 metabolism<sup>52</sup>. We examined whether mitochondrial morphology change affected the  
5 intracellular amino acid profile in HeLa cells stably expressing iCMM. In iCMM<sup>mYF</sup> and iCMM<sup>Cav1s</sup>  
6 cells, each amino acid displayed different changes upon iCMM system activation (Fig. 6d). In  
7 contrast, nearly all amino acids tended to increase upon mitochondrial morphology change in  
8 iCMM<sup>YF</sup> cells, whereas in iCMM<sup>mActZ</sup> cells, they tended to decrease (Fig. 6d). Findings were similar  
9 at 2 h and 6 h after mitochondrial morphology change induction (Fig. 6d). To analyze the interplay  
10 between mitochondrial morphology and amino acid profile further, we examined correlations  
11 among amino acids. Network architectures reflecting amino-acid correlations were similar  
12 between iCMM<sup>mYF</sup> and iCMM<sup>Cav1s</sup> cells, and between iCMM<sup>YF</sup> and iCMM<sup>mActZ</sup> cells (Fig. 6e).  
13 Glutamate, aspartate, and proline, which are regulated in p53-mediated amino acid metabolism  
14 in the vicinity of mitochondria<sup>53</sup>, presented a low correlation with serine, which is critical for  
15 mitochondrial dynamics and functions<sup>54</sup>, in iCMM<sup>mYF</sup> and iCMM<sup>Cav1s</sup> cells (Fig. 6e). However, in  
16 iCMM<sup>YF</sup> cells, nearly all amino acids presented a strong correlation with serine, whereas  
17 correlations among amino acids in iCMM<sup>mActZ</sup> cells disappeared over time (Fig. 6e). These results  
18 suggested that the amino acid profile is altered in accordance with the mitochondrial  
19 morphology change induced by iCMM.

20

## 21 **Discussion**

22 While accumulating evidence highlights the importance of mitochondrial morphology in various  
23 cellular functions, the mechanisms by which it orchestrates a dynamic intracellular signaling  
24 network in harmony with various subcellular compartments remain poorly understood. We

1 developed iCMM as a powerful tool to manipulate mitochondrial morphology in a living cell on  
2 a minutes timescale. As the intracellular mitochondrial morphology distribution is determined  
3 by the demand of mitochondria at the subcellular compartment level<sup>55</sup>, iCMM provides an  
4 advantage in resolving the biological significance of mitochondrial morphology, which would  
5 otherwise have been challenging. We established three iCMM systems capable of inducing  
6 different mitochondrial morphologies, and we investigated the biological significance of each  
7 mitochondrial morphology using these systems.

8 We found that, even after mitochondrial morphology change, the  $\Delta\psi_m$  remained stable for  
9 several hours, suggesting that there exists a system that protects the  $\Delta\psi_m$  in the unlikely event  
10 that mitochondrial morphology is altered by single or multiple environmental signals. However,  
11 mitochondrial morphology change triggered various biological responses, including changes in  
12 the OCR, mitochondrial parkin recruitment, and intracellular omics information. This suggests  
13 that mitochondrial morphology changes are not random, but are purposely coordinated based  
14 on varied cellular information. If this is true, in future, it may be possible to extract intracellular  
15 information profiles from mitochondrial morphology information using a computational  
16 approach.

17 The advantage of iCMM—similar to other CID system-based devices—is that mitochondrial  
18 morphology can be altered in different ways by changing the effector and/or anchor.  
19 Mitochondrial morphology change can be induced based on another principle by using a  
20 different effector, whereas the anchor can be designed so that the effector functions only in a  
21 specific part of the mitochondria (defined by the anchor localization), allowing fine-tuning of the  
22 mitochondrial morphology change even when the same effector is used. As mitochondria exhibit  
23 different morphologies, depending on the physiological situation, it is important to create more  
24 iCMM systems for comprehensive investigation of the biological significance of mitochondrial

1 morphology.

2 Decoding biological information embedded in mitochondrial morphology is one of the  
3 fascinating avenues in the field of mitochondrial biology. By demonstrating the usefulness of  
4 iCMM, we corroborated the biological significance of mitochondrial morphology in various  
5 cellular functions, suggesting the possibility of constructing a system that can purposefully  
6 manipulate cellular functions by changing the mitochondrial morphology. Indeed, transcriptome  
7 and amino acid profiles were reorganized upon iCMM-mediated mitochondrial morphology  
8 manipulation. Further studies will hopefully unravel the physiological significance of  
9 mitochondrial morphology in various cellular functions.

10 In summary, the iCMM system developed in this study allows effective and rapid  
11 manipulation of mitochondrial morphology. When combined with conventional genetic  
12 approaches, iCMM may provide new insights into the physiopathological functions of  
13 mitochondrial morphology in health and disease. Moreover, the working principle could be  
14 applied to other organelles. The system holds promise for improving our understanding of the  
15 biological significance of cellular organelle morphology. Consolidating precise manipulation of  
16 organelle morphology with clinical medicine will provide a novel therapeutic approach to  
17 optimizing drug efficacy.

18

## 19 **Methods**

### 20 **Plasmid construction**

21 The mYF effector was produced via point mutation of EYFP, by replacing Ala<sup>206</sup> with Lys in the YF  
22 vector (Addgene, #20175), using the Q5 Site-Directed Mutagenesis Kit (New England Biolabs,  
23 E0554S). The YF-Cav1s effector was produced by subcloning the sequence coding aa 61–178 of  
24 human caveolin 1 (UniprotKB-Q03135) into a YF vector at the C-terminus between *Hind*III and

1 *Sall*. The mActZ-FY effector was produced by subcloning sequences coding aa 30–262 of codon-  
2 optimized *Listeria monocytogenes* serovar 1/2a ActA (UniprotKB-P33379) and aa 2–380 of  
3 human zyxin (UniprotKB-Q15942) into an FY vector containing the FKBP<sup>F100Y</sup> mutant and EYFP, at  
4 the N-terminus between the *XhoI* and *EcoRI* sites. The ActA nucleic acid sequence was optimized  
5 for mammalian cells<sup>24</sup>. The Tom20-CR anchor was produced by inserting a stop codon encoding  
6 Tom20-CR<sup>56</sup> after the *XhoI* site in the vector, using the Q5 Site-Directed Mutagenesis Kit. ER and  
7 Golgi apparatus-specific marker proteins were generated by subcloning sequences coding aa  
8 100–134 of rat cytochrome b5 (UniprotKB-P00173) and aa 3131–3259 of human golgin subfamily  
9 B member 1 (UniprotKB-Q14789) into the mCherry vector at the C-terminus between the *EcoRI*  
10 and *Sall* sites, respectively. To generate lysosome-specific marker proteins, the sequence coding  
11 aa 1–417 of human LAMP1 (UniprotKB-P11279) harboring V119A and L170P mutations was  
12 subcloned into the mCherry vector at the N-terminus, between the *NheI* and *AgeI* sites. To obtain  
13 CRISPR-Cas9 expression targeting the *AAVS1* locus, donor vectors containing Tom20-CR driven  
14 by the *CAG* promoter were constructed using pAAVS1-P-CAG-mCh (Addgene, #80492). The  
15 pAAVS1-P-CAG-mCh vector was inversely amplified using primers that excluded the mCherry  
16 sequence flanked by the *EcoRI* site (termed pAAVS1-P-CAG-Tom20-CR). The insert coding Tom20-  
17 CR was amplified, followed by the assembly of the vector and insert using In-Fusion cloning  
18 (TaKaRa). For lentiviral expression of effector constructs, each effector was amplified and then  
19 subcloned into the *EcoRI* and *Sall* sites of the pLenti-EF-IRES-blast vector (a gift from Yutaka Hata).  
20 All constructs were verified by sequencing following subcloning.

21

## 22 **Cell culture and transfection**

23 Human cervical adenocarcinoma HeLa cells (CCL-2), human hepatocellular carcinoma Hep 3B  
24 cells (HB-8064), and human osteosarcoma U2-OS cells (HTB-96) were purchased from the



1 American Type Culture Collection and were cultured in Dulbecco's modified Eagle's medium  
2 (DMEM; Thermo Fisher, 11965118) supplemented with 10% fetal bovine serum (FBS; Thermo  
3 Fisher, 10270-106) and 1% Zell Shield (Minerva Biolabs GmbH, 13-0050) at 37 °C in 5% CO<sub>2</sub>. Torin  
4 1 was purchased from Merck (475991). For transient transfection of the iCMM system,  $2.4 \times 10^5$   
5 cells were plated on a poly-lysine-coated glass-bottom dish (Matsunami, D1131H) and incubated  
6 for 2 h at 37 °C in 5% CO<sub>2</sub>. Following incubation, the cells were transfected with the plasmid using  
7 FuGENE HD (Promega, E2311). Indicated experiments were carried out 20–32 h after  
8 transfection.

### 9 **Lentivirus production**

10 HEK293T cells were transiently transfected with pLenti-EF-blast vectors together with pCAG-  
11 HIVgp and pCMV-VSV-G-RSV-Rev (provided by RIKEN BRC, Ibaraki, Japan) using TransIT-2020  
12 Reagent (TaKaRa). The medium, containing lentivirus, was collected.

13

### 14 **Establishment of HeLa cells stably expressing the iCMM system**

15 First, a HeLa cell line that stably expressed Tom20-CR was established. For gene targeting at the  
16 *AAVS1* locus, pXAT2 and pAAVS1-P-CAG-Tom20-CR were transfected into  $1 \times 10^6$  cells in a single-  
17 cell suspension using NEPA21 electroporation. Two days after electroporation,  $2 \mu\text{g ml}^{-1}$  of  
18 puromycin was added with daily feeding over a period of 7 days to select for targeted cells. Serial  
19 dilution cloning was performed to isolate single-cell-derived clones. The clone was incubated  
20 with lentivirus encoding an iCMM effector in the presence of  $5 \mu\text{g ml}^{-1}$  polybrene. After 48 h,  
21 the clones were cultured in the presence of  $5 \mu\text{g ml}^{-1}$  blasticidin for 10 days to select for cells  
22 expressing the iCMM effector. Following the selection process, cloning was performed using 3.2-  
23 mm sterile cloning discs (Merck).

24

## 1 **Live-cell imaging**

2 ECFP, EYFP, and mCherry excitation was carried out using an Intensilight mercury-fiber  
3 illuminator (Nikon). Data were processed through a CFP-A-Basic-NTE filter (Semrock), YFP-A-  
4 Basic-NTE filter (Semrock), and mCherry-B-NTE-ZERO filter (Semrock) for ECFP, EYFP, and  
5 mCherry imaging, respectively. Cells were viewed using a 40× objective (Plan Apochromat  
6 Lambda Series, Nikon) mounted on an inverted Eclipse Ti2-E microscope (Nikon) and imaged  
7 using a Zyla 4.2 PLUS sCMOS camera (Oxford Instruments). Imaging data were processed using  
8 the NIS-Elements AR 5.01 imaging software (Nikon). All imaging experiments were completed at  
9 37 °C in 5% CO<sub>2</sub> using an STX stage top incubator (Tokai-Hit). For all live-cell imaging, cells were  
10 suspended in phenol red-free DMEM (Thermo Fisher, 31053028) supplemented with 10% FBS, 4  
11 mM L-glutamine (Thermo Fisher, 25030081), and 1% penicillin-streptomycin (Sigma-Aldrich,  
12 P4333). Time was measured from the first frame (0 min), and 50 nM rapamycin (Calbiochem)  
13 was added at the indicated time.

14

## 15 **mitochondrial morphology analysis**

16 Cells were cultured for 30 min in the presence of 0.5 μM MitoTracker Red CM-H2Xros (Thermo  
17 Fisher, M7513) at 37 °C in 5% CO<sub>2</sub>. The cells were washed with imaging medium twice, and the  
18 fluorescence in mitochondria was recorded using NIS software (Nikon). Fluorescence images  
19 were processed using Unsharp Mask (Power: 1.0; Area: 41) followed by Rolling Ball Correction  
20 (Radius 1.95 μm; bright signal) using NIS-Elements AR 5.01. Subsequently, the image was  
21 processed by contrast limited adaptive histogram equalization, followed by thresholding using  
22 the open-source software Fiji (22743772). Average mitochondrial footprint, average number of  
23 individual mitochondria, and roundness of mitochondria were analyzed using the 'Analyze  
24 Particle' function in Fiji.

1

## 2 **CLEM**

3 CLEM was carried out at Japan Electron Optics Laboratory (Tokyo, Japan). Briefly, HeLa cells  
4 (cultured on a glass-bottom dish) that transiently expressed the iCMM system were washed  
5 twice with 1 ml of PBS. The cells were then fixed for 10 min in a fixation mixture containing 4%  
6 formaldehyde (NEM, 3153) and 0.1% glutaraldehyde (NEM, 304) in PBS at room temperature.  
7 After three washes with PBS, the cells were imaged using a Nikon A1R equipped with a Nikon  
8 A1plus camera, an Apo 40× WI λS DIC N2 (Nikon), as well as a 405 and a 408 laser for ECFP and  
9 EYFP excitation, respectively. For scanning electron microscopy (SEM) imaging, cells were  
10 subjected to post-fixation (1% OsO<sub>4</sub> and 1% tannic acid), Bloc contrast staining (1% uranyl acetate  
11 and lead aspartate), and dehydration, followed by Epon embedding. SEM imaging was carried  
12 out using a JSM-7900F (JEOL).

13

## 14 **Δψm analysis**

15 Cells were cultured for 15 min in the presence of 50 nM TMRE at 37 °C in 5% CO<sub>2</sub>. They were  
16 then washed with imaging medium twice, and TMRE fluorescence in mitochondria was recorded  
17 with the NIS software (Nikon). Background fluorescence was measured in a cell area devoid of  
18 mitochondria and subtracted from the fluorescence obtained from mitochondria.

19

## 20 **Extracellular flux analysis**

21 The OCR was measured using a Seahorse XF24 extracellular flux analyzer (Seahorse Bioscience).  
22 HeLa cells stably expressing the iCMM system were seeded in a 24-well culture plate (Seahorse  
23 Bioscience) at  $5 \times 10^4$  cells per well in 250 μl of culture medium and were incubated at 37 °C and  
24 5% CO<sub>2</sub> for 24 h. The cells were treated with DMSO or 50 nM rapamycin for the indicated time,

1 and the culture medium was replaced with 525  $\mu$ l of XF Base Medium pH 7.4 (Seahorse  
2 Bioscience) supplemented with 4 mM GlutaMAX and 25 mM D-glucose. The cells were incubated  
3 at 37 °C in a non-CO<sub>2</sub> incubator for 30 min. Meanwhile, an XF24 sensor cartridge (hydrated  
4 overnight; Seahorse Bioscience) was loaded with the appropriate volumes of oligomycin (final  
5 concentration, 1  $\mu$ M), protonophore FCCP (final concentration, 0.125  $\mu$ M), and  
6 rotenone/antimycin A (final concentrations, 0.5  $\mu$ M). Three basal oxygen consumption  
7 measurements were recorded (each for 8 min) before the addition of oligomycin, FCCP, and  
8 finally, rotenone/antimycin A. The effects of these chemicals on mitochondrial oxygen  
9 consumption were also measured three times, each for 8 min. Data were normalized to the  
10 protein concentration in each group, which was determined using the Protein Assay BCA Kit  
11 (Nacalai, Japan)

12

### 13 **Cell proliferation assay**

14 Cells ( $1 \times 10^6$ ) were cultured for 48 h at 37 °C in 5% CO<sub>2</sub>. Trypan blue (Thermo Fisher, 15250-061)  
15 stained cells were counted using a LUNA cell counter (Logos Biosystems).

16

### 17 **Transcriptome analysis**

18 Cells stably expressing indicated iCMM system were harvested at 2 h or 6 h after rapamycin  
19 treatment, and RNA was isolated using Direct-zol 96 (Zymo Research). RNA-seq libraries were  
20 prepared from 500 ng of RNA using Quant-seq 3' FWD (Lexogen) following the manufacturer's  
21 instructions. An equal amount of each Quant-seq library was pooled and diluted to 4 pM. The  
22 library was denatured, and 2.3 nM of denatured library was subjected to RNA-seq in an Illumina  
23 Next-seq 500 instrument using high-output flow cells and the 75 single-end mode. Using BBduk,  
24 low-quality bases were trimmed, and poly-A or -T sequences, adapter sequences, as well as 11-

1 base and one-base reads (from the left and right sides of reads, respectively), were mapped to  
2 the human genome (GRCh38.p12) using STAR-aligner<sup>57</sup>. Read counts were obtained using  
3 featureCounts<sup>58</sup>. Samples that generated at least one million mapped reads were used for  
4 further analyses. Downstream analysis was performed using R [R Core Team (2017). R: A  
5 language and environment for statistical computing. R Foundation for Statistical Computing,  
6 Vienna, Austria. URL <https://www.R-project.org/>]. Differentially expressed genes (DEGs) were  
7 identified using edgeR<sup>59,60</sup>. To determine DEGs, we employed a generalized linear model, and the  
8 gene-wise likelihood ratio test. DEGs with fold change > 2 and FDR-adjusted P < 0.05 were  
9 considered significant. Competitive gene set tests were performed to account for inter-gene  
10 correlation using the camera function in the limma package as well as three gene-set collections  
11 (hallmark, C3 regulatory target, and C5 GO) from the Molecular Signatures Database  
12 (MSigDB)<sup>50,51,61</sup>. An FDR < 0.01 was considered significant, and up to 30 gene sets in each  
13 direction (up- or downregulated) of a gene-set collection were reported. If both directions  
14 occurred in two or more comparisons, the FDR was set as 1 for the different direction (e.g.,  
15 GO\_Actomyosin was enriched in upregulated genes in mActZ, but it also enriched in  
16 downregulated genes in other comparisons. In the plot showing upregulated genes, FDRs for the  
17 comparisons other than mActZ are 1).

18

### 19 **Metabolome analysis**

20 Cells growing on 10-cm dishes were washed twice with ice-cold PBS and intracellular metabolites  
21 were extracted by briefly incubating the cells with 1 ml of methanol containing internal control  
22 substances (50  $\mu$ M 2-morpholinoethanesulfonic acid and 50  $\mu$ M methionine sulfone) on ice. Cell  
23 debris was removed by centrifugation (14,000  $\times g$  for 10 min at 4 °C), and 600  $\mu$ l of supernatant  
24 was mixed with 300  $\mu$ l of ultrapure water and 450  $\mu$ l of chloroform. Following centrifugation

1 (16,000 × *g* for 3 min at 4 °C), 800 µl of supernatant was mixed with 400 µl of ultrapure water  
2 and centrifuged again. The supernatant (1 ml) was evaporated for 40 min to reduce the organic  
3 solvent content. The samples were subjected to ultrafiltration using 3-kDa filters (Amicon Ultra  
4 3K device, Merck). After lyophilization, the samples were dissolved in 50 µl of ultrapure water.  
5 Metabolome analysis was conducted by LC-MS/MS (LCMS-8030, Shimadzu, Kyoto, Japan) using  
6 the primary metabolite method package version 2 (Shimadzu) according to the manufacturer's  
7 protocol.

8

### 9 **Apoptosis analysis**

10 Cells were treated with DMSO or rapamycin for 1 h and then incubated with 266 nM STS for 6 h.  
11 Then, the cells were incubated with Hoechst 33342 (Thermo Fisher) for 10 min for nuclear  
12 staining. After fixation with a 4% paraformaldehyde phosphate buffer solution (Wako, 163-  
13 20145), the cells were scored as possessing normal or apoptotic nuclei, in several fields. Three  
14 independent experiments were conducted. Data are reported as the percentage of cells with  
15 apoptotic nuclei among total cells.

16

### 17 **Western blot analysis**

18 Total cell lysates were prepared using NP40 cell lysis buffer (Thermo Fisher, FNN0021) containing  
19 a protease/phosphatase inhibitor cocktail (Cell Signaling Technology, #5872), and protein  
20 concentrations were determined using a BCA assay (Thermo Fisher). For western blotting,  
21 protein samples were separated by sodium dodecyl sulfate-polyacrylamide gel electrophoresis  
22 and transferred to nitrocellulose membranes (Bio-Rad, 1620115). The membranes were blocked  
23 in Tris-buffered saline-Tween 20 containing 5% nonfat milk at room temperature for 1 h. The  
24 membranes were then incubated with the following primary antibodies for 18 h at 4 °C: anti-

1 caspase-3 (#14220), anti-phospho-p70 S6 kinase (Thr389) (#9234), anti-p70 S6 kinase (#2708),  
2 and anti- $\beta$ -actin (#4970) (Cell Signaling Technology). The membranes were subsequently  
3 incubated with horseradish peroxidase-conjugated goat anti-rabbit IgG (Cell Signaling  
4 Technology) and visualized using chemiluminescence detection (Immobilon, Millipore).  
5 Coomassie brilliant blue staining was conducted using Bullet CBB Stain One Super (Nacalai,  
6 13542-65) according to manufacturer's protocol.

7

### 8 **Amino acid correlation network analysis**

9 The network graph was drawn using the Fruchterman–Reingold algorithm. This uses a force-  
10 directed graph-drawing algorithm to determine the position of each node from the relationship  
11 between the nodes and the edges. The nodes receive the force and moves. A force that brings  
12 the node closer (attractive force) and a force that moves the node away (repulsive force) work  
13 simultaneously. The attractive force  $f_a$  and the repulsive force  $f_r$  were defined by the  
14 following equations:

15

$$f_a = \frac{d^2}{k} \quad (1)$$

$$f_r = -\frac{k^2}{d} \quad (2)$$

$$k = C \sqrt{\frac{area}{|V|}} \quad C \in \mathbb{R} \quad (3),$$

16

1 where  $d$  was the distance between nodes, area was the area of the drawing space, and  $|V|$  was  
2 the number of nodes. The force applied to the node was  $f_a + f_r$ , and is shown in the graph

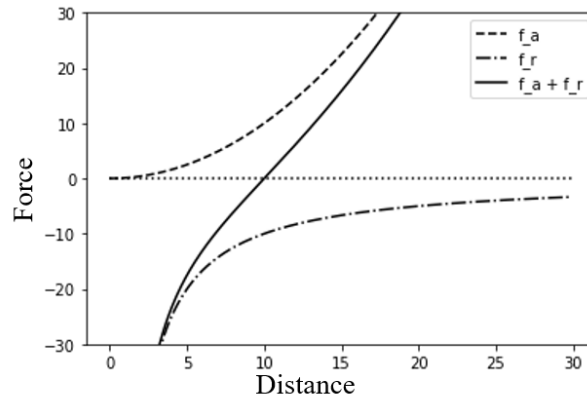

3 below ( $k = 10$ ).

4

5 In addition, the temperature  $t$  that limits the amount of movement of the node was lowered  
6 step by step. The moving direction vector is given by Equation 4.

7

$$v = \frac{v}{|v|} * \min(|v|, t) \quad (4)$$

8

9 The initial position of each node was randomly assigned, the positions of the nodes were  
10 updated using the force and temperature parameters, and this calculation was repeated a  
11 certain number of times. The development environment was python 3.7, and the graph was  
12 created using NetworkX version 2.3. The edge weights were given by the correlation coefficient  
13 of each amino acid. The  $k$  value of the graph-drawing parameters of NetworkX was set to 1.5,  
14 and the other parameters used default values.

15

## 16 **Statistical analysis**

17 Statistical analysis was performed using an paired t-test and unpaired two-tailed Student's t test.



1 The F test was used to determine whether variances were equal or unequal.

2

### 3 **Acknowledgements**

4 We thank Katsuyuki Suzuki, Akira Takebe (JEOL Ltd) and Katsuko Okubo (University of Tsukuba)

5 for technical assistance, Keita Takahashi (NikonInstech CO., Ltd), Hiroyuki Soejima (Tokyo Science

6 CO., Ltd), and Yasuko Maruyama (University of Tsukuba) for generous support. This study was

7 supported in part by Grant-in-Aid for Scientific Research on Innovative Areas (18H04854),

8 Leading Initiative for Excellent Young Researchers, JST CREST (JPMJCR1927).

9

### 10 **Author contributions**

11 T.Miyamoto. conceived the project. T.Miyamoto. designed the experiments. T.Miyamoto., H.U.,

12 Y.M., S.G., D.Y., M.M., Y.Y., H.N., N.H., Y.T., M.S., T.Matsuzaka, F.H., S.I.T., N.Y., K.I., H.S. conducted

13 the experiments. T.Miyamoto. and H.U. wrote the manuscript.

14

### 15 **Competing interests**

16 The authors declare that they have no competing interests.

## 1   **References**

- 2   1.     Gray, M. W., Burger, G. & Franz Lang, B. The origin and early evolution of mitochondria. *Genome*  
3     *Biol.* **2**, 1–5 (2001).
- 4   2.     Smeitink, J. A., Zeviani, M., Turnbull, D. M. & Jacobs, H. T. Mitochondrial medicine: A metabolic  
5     perspective on the pathology of oxidative phosphorylation disorders. *Cell Metab.* **3**, 9–13 (2006).
- 6   3.     Jakobs, S. *et al.* Spatial and temporal dynamics of budding yeast mitochondria lacking the  
7     division component Fis1p. *J. Cell Sci.* **116**, 2005–2014 (2003).
- 8   4.     Detmer, S. A. & Chan, D. C. Functions and dysfunctions of mitochondrial dynamics. *Nat. Rev.*  
9     *Mol. Cell Biol.* **8**, 870–879 (2007).
- 10 5.     Picard, M., Shirihai, O. S., Gentil, B. J. & Burrelle, Y. Mitochondrial morphology transitions and  
11     functions: Implications for retrograde signaling? *Am. J. Physiol. - Regul. Integr. Comp. Physiol.*  
12     **304**, (2013).
- 13 6.     McCarron, J. G. *et al.* From structure to function: Mitochondrial morphology, motion and  
14     shaping in vascular smooth muscle. *J. Vasc. Res.* **50**, 357–371 (2013).
- 15 7.     Yu-Wai-Man, P. & Chinnery, P. F. Dysfunctional mitochondrial maintenance: What breaks the  
16     circle of life? *Brain* **135**, 9–11 (2012).
- 17 8.     Archer, S. L. Mitochondrial dynamics--mitochondrial fission and fusion in human diseases. *N.*  
18     *Engl. J. Med.* **369**, 2236–51 (2013).
- 19 9.     Leonard, A. P. *et al.* Quantitative analysis of mitochondrial morphology and membrane potential  
20     in living cells using high-content imaging, machine learning, and morphological binning. *Biochim.*  
21     *Biophys. Acta - Mol. Cell Res.* **1853**, 348–360 (2015).
- 22 10.    Cassidy-Stone, A. *et al.* Chemical Inhibition of the Mitochondrial Division Dynamin Reveals Its  
23     Role in Bax/Bak-Dependent Mitochondrial Outer Membrane Permeabilization. *Dev. Cell* **14**, 193–  
24     204 (2008).
- 25 11.    McCormick, A. L., Smith, V. L., Chow, D. & Mocarski, E. S. Disruption of Mitochondrial Networks  
26     by the Human Cytomegalovirus. *Society* **77**, 631–641 (2003).
- 27 12.    Trevisan, T. *et al.* Manipulation of Mitochondria Dynamics Reveals Separate Roles for Form and

- 1 Function in Mitochondria Distribution. *Cell Rep.* **23**, 1742–1753 (2018).
- 2 13. Pich, S. *et al.* The Charcot-Marie-Tooth type 2A gene product, Mfn2, up-regulates fuel oxidation  
3 through expression of OXPHOS system. *Hum. Mol. Genet.* **14**, 1405–1415 (2005).
- 4 14. Chen, H., Chomyn, A. & Chan, D. C. Disruption of fusion results in mitochondrial heterogeneity  
5 and dysfunction. *J. Biol. Chem.* **280**, 26185–26192 (2005).
- 6 15. Chen, H. *et al.* Mitofusins Mfn1 and Mfn2 coordinately regulate mitochondrial fusion and are  
7 essential for embryonic development. *J. Cell Biol.* **160**, 189–200 (2003).
- 8 16. Chen, H. *et al.* Mitochondrial fusion is required for mtdna stability in skeletal muscle and  
9 tolerance of mtDNA mutations. *Cell* **141**, 280–289 (2010).
- 10 17. Derose, R., Miyamoto, T. & Inoue, T. Manipulating signaling at will: Chemically-inducible  
11 dimerization (CID) techniques resolve problems in cell biology. *Pflugers Arch. Eur. J. Physiol.* **465**,  
12 409–417 (2013).
- 13 18. Miyamoto, T., Razavi, S., Derose, R. & Inoue, T. Synthesizing biomolecule-based boolean logic  
14 gates. *ACS Synth. Biol.* **2**, 72–82 (2013).
- 15 19. Putyrski, M. & Schultz, C. Protein translocation as a tool: The current rapamycin story. *FEBS Lett.*  
16 **586**, 2097–2105 (2012).
- 17 20. Fegan, A., White, B., Carlson, J. C. T. & Wagner, C. R. Chemically controlled protein assembly:  
18 Techniques and applications. *Chem. Rev.* **110**, 3315–3336 (2010).
- 19 21. Csordás, G. *et al.* Imaging Interorganelle Contacts and Local Calcium Dynamics at the ER-  
20 Mitochondrial Interface. *Mol. Cell* **39**, 121–132 (2010).
- 21 22. Miyamoto, T. *et al.* Compartmentalized AMPK Signaling Illuminated by Genetically Encoded  
22 Molecular Sensors and Actuators. *Cell Rep.* **11**, 657–670 (2015).
- 23 23. Inoue, T., Heo, W. Do, Grimley, J. S., Wandless, T. J. & Meyer, T. An inducible translocation  
24 strategy to rapidly activate and inhibit small GTPase signaling pathways. *Nat. Methods* **2**, 415–  
25 418 (2005).
- 26 24. Nakamura, H. *et al.* ActuAtoR, a molecular tool for generating force in living cells: Controlled  
27 deformation of intracellular structures. *bioRxiv* 2020.03.30.016360 (2020).

- 1           doi:10.1101/2020.03.30.016360
- 2   25.   Lambert, T. J. FPbase: a community-editable fluorescent protein database. *Nat. Methods* **16**,
- 3           277–278 (2019).
- 4   26.   Parton, R. G. & Simons, K. The multiple faces of caveolae. *Nat. Rev. Mol. Cell Biol.* **8**, 185–194
- 5           (2007).
- 6   27.   Schlegel, A. & Lisanti, M. P. A molecular dissection of caveolin-1 membrane attachment and
- 7           oligomerization. Two separate regions of the caveolin-1 c-terminal domain mediate membrane
- 8           binding and oligomer/oligomer interactions in vivo. *J. Biol. Chem.* **275**, 21605–21617 (2000).
- 9   28.   Golsteyn, R. M., Beckerle, M. C., Koay, T. & Friederich, E. Structural and functional similarities
- 10          between the human cytoskeletal protein zyxin and the ActA protein of *Listeria monocytogenes*.
- 11          *J. Cell Sci.* **110**, 1893–1906 (1997).
- 12   29.   Smith, G. A. & Portnoy, D. A. How the *Listeria monocytogenes* ActA protein converts actin
- 13          polymerization into a motile force. *Trends Microbiol.* **5**, 272–276 (1997).
- 14   30.   Miyamoto, T. *et al.* Rapid and orthogonal logic gating with a gibberellin-induced dimerization
- 15          system. *Nat. Chem. Biol.* **8**, 465–470 (2012).
- 16   31.   Zorova, L. D. *et al.* Mitochondrial membrane potential. *Anal. Biochem.* **552**, 50–59 (2018).
- 17   32.   Ichinohe, T., Yamazaki, T., Koshiba, T. & Yanagi, Y. Mitochondrial protein mitofusin 2 is required
- 18          for NLRP3 inflammasome activation after RNA virus infection. *Proc. Natl. Acad. Sci. U. S. A.* **110**,
- 19          17963–17968 (2013).
- 20   33.   Koshiba, T., Yasukawa, K., Yanagi, Y. & Kawabata, S. Mitochondrial membrane potential is
- 21          required for MAVS-mediated antiviral signaling. *Sci. Signal.* **4**, 1–8 (2011).
- 22   34.   Zhang, K., Li, H. & Song, Z. Membrane depolarization activates the mitochondrial protease
- 23          OMA1 by stimulating self-cleavage. *EMBO Rep.* **15**, 576–585 (2014).
- 24   35.   Rapaport, D., Brunner, M., Neupert, W. & Westermann, B. Fzo1p is a mitochondrial outer
- 25          membrane protein essential for the biogenesis of functional mitochondria in *Saccharomyces*
- 26          *cerevisiae*. *J. Biol. Chem.* **273**, 20150–20155 (1998).
- 27   36.   Twig, G., Hyde, B. & Shirihai, O. S. Mitochondrial fusion, fission and autophagy as a quality

- 1 control axis: The bioenergetic view. *Biochim. Biophys. Acta - Bioenerg.* **1777**, 1092–1097 (2008).
- 2 37. Rosario, F. J. *et al.* Mechanistic Target of Rapamycin Complex 1 Promotes the Expression of  
3 Genes Encoding Electron Transport Chain Proteins and Stimulates Oxidative Phosphorylation in  
4 Primary Human Trophoblast Cells by Regulating Mitochondrial Biogenesis. *Sci. Rep.* **9**, 1–14  
5 (2019).
- 6 38. Lerner, C. *et al.* Reduced mammalian target of rapamycin activity facilitates mitochondrial  
7 retrograde signaling and increases life span in normal human fibroblasts. *Aging Cell* **12**, 966–977  
8 (2013).
- 9 39. Sun, H., Chen, L., Cao, S., Liang, Y. & Xu, Y. Warburg Effects in Cancer and Normal Proliferating  
10 Cells: Two Tales of the Same Name. *Genomics, Proteomics Bioinforma.* **17**, 273–286 (2019).
- 11 40. Youle, R. J. & Narendra, D. P. Mechanisms of mitophagy. *Nat. Rev. Mol. Cell Biol.* **12**, 9–14  
12 (2011).
- 13 41. Narendra, D., Tanaka, A., Suen, D. F. & Youle, R. J. Parkin is recruited selectively to impaired  
14 mitochondria and promotes their autophagy. *J. Cell Biol.* **183**, 795–803 (2008).
- 15 42. Elmore, S. Apoptosis: A Review of Programmed Cell Death. *Toxicol. Pathol.* **35**, 495–516 (2007).
- 16 43. Wang, C. & Youle, R. J. The Role of Mitochondria in Apoptosis. *Annu. Rev. Genet.* **43**, 95–118  
17 (2009).
- 18 44. Karbowski, M. & Youle, R. J. Dynamics of mitochondrial morphology in healthy cells and during  
19 apoptosis. *Cell Death Differ.* **10**, 870–880 (2003).
- 20 45. Evan, G. I. & Vousden, K. H. Proliferation, cell cycle and apoptosis in cancer. *Nature* **411**, 342–  
21 348 (2001).
- 22 46. Rehman, J. *et al.* Inhibition of mitochondrial fission prevents cell cycle progression in lung  
23 cancer. *FASEB J.* **26**, 2175–2186 (2012).
- 24 47. Lee, Y., Jeong, S.-Y., Karbowski, M., Smith, C. L. & Youle, R. J. Roles of the Mammalian  
25 Mitochondrial Fission and Fusion Mediators Fis1, Drp1, and Opa1 in Apoptosis. *Mol Biol Cell* **15**,  
26 5001–11 (2004).
- 27 48. Tee, A. R. & Proud, C. G. Staurosporine inhibits phosphorylation of translational regulators linked

- 1 to mTOR. *Cell Death Differ.* **8**, 841–849 (2001).
- 2 49. Minster, R. L. *et al.* A thrifty variant in CREBRF strongly influences body mass index in Samoans.  
3 *Nat. Genet.* **48**, 1049–1054 (2016).
- 4 50. Subramanian, A. *et al.* Gene set enrichment analysis: A knowledge-based approach for  
5 interpreting genome-wide expression profiles. *Proc. Natl. Acad. Sci. U. S. A.* **102**, 15545–15550  
6 (2005).
- 7 51. Liberzon, A. *et al.* The Molecular Signatures Database Hallmark Gene Set Collection. *Cell Syst.* **1**,  
8 417–425 (2015).
- 9 52. Guda, P., Guda, C. & Subramaniam, S. Reconstruction of Pathways Associated with Amino Acid  
10 Metabolism in Human Mitochondria. *Genomics, Proteomics Bioinforma.* **5**, 166–176 (2007).
- 11 53. Miyamoto, T. *et al.* Argininosuccinate synthase 1 is an intrinsic Akt repressor transactivated by  
12 p53. *Sci. Adv.* **3**, 1–15 (2017).
- 13 54. Gao, X. *et al.* Serine Availability Influences Mitochondrial Dynamics and Function through Lipid  
14 Metabolism. *Cell Rep.* **22**, 3507–3520 (2018).
- 15 55. Westermann, B. Bioenergetic role of mitochondrial fusion and fission. *Biochim. Biophys. Acta -*  
16 *Bioenerg.* **1817**, 1833–1838 (2012).
- 17 56. Miyamoto, T. *et al.* Compartmentalized AMPK Signaling Illuminated by Genetically Encoded  
18 Molecular Sensors and Resource Compartmentalized AMPK Signaling Illuminated by Genetically  
19 Encoded Molecular Sensors and Actuators. *CellReports* **11**, 657–670 (2015).
- 20 57. Dobin, A. *et al.* STAR: Ultrafast universal RNA-seq aligner. *Bioinformatics* **29**, 15–21 (2013).
- 21 58. Liao, Y., Smyth, G. K. & Shi, W. FeatureCounts: An efficient general purpose program for  
22 assigning sequence reads to genomic features. *Bioinformatics* **30**, 923–930 (2014).
- 23 59. Robinson, M. D., McCarthy, D. J. & Smyth, G. K. edgeR: A Bioconductor package for differential  
24 expression analysis of digital gene expression data. *Bioinformatics* **26**, 139–140 (2009).
- 25 60. McCarthy, D. J., Chen, Y. & Smyth, G. K. Differential expression analysis of multifactor RNA-Seq  
26 experiments with respect to biological variation. *Nucleic Acids Res.* **40**, 4288–4297 (2012).
- 27 61. Liberzon, A. *et al.* Molecular signatures database (MSigDB) 3.0. *Bioinformatics* **27**, 1739–1740

1 (2011).

2

### 3 **Figure legends**

4 **Fig. 1: iCMM as a novel CID system for rapid manipulation of mitochondrial morphology in a**  
5 **living cell.**

6 **a**, Schematic diagram of the iCMM system. **b**, Structural features of iCMM effectors and anchor.  
7 **c–e**, Time-lapse images of HeLa cells expressing Tom20-CR and YF (**c**), YF-Cav1s (**d**), or mActZ-FY  
8 (**e**) as iCMM anchor and effectors, respectively. Mitochondria (red) were stained with  
9 MitoTracker Red CMXRos; 2 min/frame. Rapamycin was added after image acquisition at frame  
10 6 (indicated as “0 min”). Scale bar: 10  $\mu\text{m}$ . **f–h**, Mitochondrial roundness in HeLa cells expressing  
11 indicated iCMM and in surrounding iCMM-negative cells (control) was analyzed before (0 min)  
12 and after (30 min) activating iCMM system. Quantification was performed on three independent  
13 experiments. Gray: analyzed single cell; Red: average.  $p$  = paired t-test. *N.S.*: statistically  
14 nonsignificant. **i–k**, Mitochondrial structures in HeLa cells expressing indicated effectors and  
15 Tom20-CR were examined with CLEM after 30 min of iCMM activation. Merged fluorescence  
16 images (blue: Tom20-CR, green: indicated effector) and scanning electron microscopy (SEM)  
17 images are shown. White boxes in merged fluorescence images indicate areas shown as SEM  
18 images. Scale bar: 10  $\mu\text{m}$  (merged fluorescence images), 1  $\mu\text{m}$  (SEM images).

19

20

21 **Fig. 2: iCMM alters mitochondrial morphology without loss of  $\Delta\psi\text{m}$ .**

22 **a–d**,  $\Delta\psi\text{m}$  in HeLa cells expressing the indicated iCMM system was measured at each indicated  
23 time point after activating iCMM system. Mitochondria (red) were stained with TMRE.  
24 Representative images at each time point are shown. Quantification was performed on three

1 independent experiments. All data are presented as the mean  $\pm$  standard deviation. *N.S.*:  
2 statistically nonsignificant (Student's t-test). **e–h**, Time-lapse images of  $\Delta\psi_m$  in HeLa cells  
3 expressing Tom20-CR and indicated iCMM effector are shown; 5 min/frame. FCCP was added  
4 after image acquisition at frame 1. All data are presented as the mean  $\pm$  standard deviation  
5 obtained from three independent experiments. Quantification is shown in Supplementary Fig. 5.

6

7 **Fig. 3: mActZ-FY-induced disruption of mitochondrial morphology reduces the OCR.**

8 **a–d**, OCR in iCMM<sup>mYF</sup> (a), iCMM<sup>YF</sup> (b), iCMM<sup>Cav1s</sup> (c), and iCMM<sup>mActZ</sup> (d) are shown. Before OCR  
9 measurement, all cell lines were treated with DMSO or rapamycin for 30 min. Quantification was  
10 performed on three independent experiments. All data are presented as the mean  $\pm$  standard  
11 deviation. \**P* < 0.05, *N.S.*: statistically nonsignificant (Paired t-test). **e–h**, Intracellular ATP level in  
12 iCMM<sup>mYF</sup> (e), iCMM<sup>YF</sup> (f), iCMM<sup>Cav1s</sup> (g), and iCMM<sup>mActZ</sup> (h) are shown. Each cell line was treated  
13 with DMSO (D) or rapamycin (R) for 1 h, followed by 2-DG treatment for 4 h. Quantification was  
14 performed on three independent experiments. All data are presented as the mean  $\pm$  standard  
15 deviation. *N.S.*: statistically nonsignificant (Student's t-test).

16

17 **Fig. 4: Translocation efficiency of Parkin to mitochondria in the presence of FCCP is partially**  
18 **regulated by mitochondrial morphology.**

19 **a**, HeLa cells transiently expressing Tom20-CR, the indicated iCMM effector, and mCh-Parkin  
20 were treated with rapamycin for 2 h. Quantification was performed in three independent  
21 experiments. All data are presented as the mean  $\pm$  standard deviation. \**P* < 0.05, *N.S.*: statistically  
22 nonsignificant (Student's t-test). **b**, HeLa cells from (a) not showing Parkin translocation to the  
23 mitochondria were treated with 10  $\mu$ M FCCP for 110 min, then cells showing Parkin translocation  
24 to the mitochondria were counted. Quantification was performed in three independent



1 experiments. All data are presented as mean  $\pm$  standard deviation. \* $P < 0.05$ , *N.S.*: statistically  
2 nonsignificant (Student's t-test). **c**, HeLa cells not showing Parkin translocation to the  
3 mitochondria were subjected to time-lapse imaging; 1 min/frame. FCCP (10  $\mu$ M) was added after  
4 image acquisition at frame 11 (red triangle). Representative images are shown. Scale bar: 10  $\mu$ m.  
5 Mitochondria: Tom20-CR, Effector: indicated iCMM effector, Parkin: mCh-Parkin. Ratio =  
6 Parkin/mitochondria. **d**, Time-lapse images of Parkin in mitochondria in the cells from (c) are  
7 shown. All data are presented as the mean  $\pm$  standard deviation.

8

9 **Fig. 5: mitochondrial morphology does not affect STS-induced apoptosis**

10 **a**, HeLa cells stably expressing Tom20-CR and the indicated iCMM effector were treated with  
11 DMSO or rapamycin for 1 h, followed by treatment with 266 nM STS for 6 h. The cells were then  
12 subjected to western blot analysis. **b**, HeLa cells stably expressing Tom20-CR and the indicated  
13 iCMM effector were treated as in (a). Subsequently, normal and apoptotic nuclei in the cells were  
14 counted. mYF-DMSO: n = 775, mYF-Rapa: n = 974, YF-DMSO: n = 727, YF-Rapa: n = 695, Cav1s-  
15 DMSO: n = 864, Cav1s-Rapa: n = 684, mActZ-DMSO: n = 545, mActZ-Rapa: n = 568. Quantification  
16 was performed in three independent experiments. All data are presented as the mean  $\pm$  standard  
17 deviation. *N.S.*: statistically nonsignificant (Student's t-test). **c**, HeLa cells transiently expressing  
18 Tom20-CR and the indicated iCMM effector were treated as in (a). Subsequently, normal and  
19 apoptotic nuclei in cells expressing iCMM (iCMM-positive cells) or peripherally not expressing  
20 iCMM (iCMM-negative cells) were counted. For iCMM-positive cells, the following cell numbers  
21 were determined: mYF-DMSO: n = 223, mYF-Rapa: n = 211, YF-DMSO: n = 222, YF-Rapa: n = 198,  
22 Cav1s-DMSO: n = 194, Cav1s-Rapa: n = 261, mActZ-DMSO: n = 190, mActZ-Rapa: n = 208. For  
23 iCMM-negative cells, the following cell numbers were determined: mYF-DMSO: n = 1002, mYF-  
24 Rapa: n = 544, YF-DMSO: n = 794, YF-Rapa: n = 735, Cav1s-DMSO: n = 967, Cav1s-Rapa: n = 995,

1 mActZ-DMSO: n = 851, mActZ-Rapa: n = 810. Quantification was performed in three independent  
2 experiments. All data are presented as the mean  $\pm$  standard deviation. *N.S.*: statistically  
3 nonsignificant (Student's t-test). D: DMSO, R: Rapamycin.

4

5 **Fig. 6: iCMM-induced mitochondrial morphology change results in reorganization of the**  
6 **transcriptome and amino acid profiles in cells.**

7 **a–c**, Hallmark gene sets (a), GO terms (b), and regulatory targets (c) enriched upon mitochondrial  
8 morphology change in cells stably expressing iCMM were analyzed (n = 3), and heatmaps of –  
9 Log<sub>10</sub> (FDR) are shown. Cells were harvested at the indicated time points after adding DMSO  
10 (iCMM: OFF) or rapamycin (iCMM: ON). Darker color indicates lower FDR. The FDR was  
11 calculated from comparisons between DMSO- and rapamycin-treated cells for each effector.  
12 Up/Down indicates the direction of a transcription change in rapamycin-treated compared to  
13 DMSO-treated cells. Up to a maximum of 30 gene sets with FDR < 0.01 in a direction and category  
14 are shown. **d, e**, Amino acid profiles of cells stably expressing iCMM were visualized (n = 3). Cells  
15 were harvested at the indicated time points after adding DMSO (iCMM: OFF) or rapamycin  
16 (iCMM: ON). (d) Radar charts of the amino acid profiles of cells stably expressing iCMM. Blue:  
17 DMSO-treated cells, orange: rapamycin-treated cells. (e) Network graphs based on the  
18 correlation coefficient for each amino acid. The color of each node represents the correlation  
19 with each amino acid based on serine. The color of the edge represents the correlation between  
20 amino acids. Blue: low correlation coefficient, red: high correlation. The thickness of the edge  
21 represents the absolute value of the correlation coefficient.

22

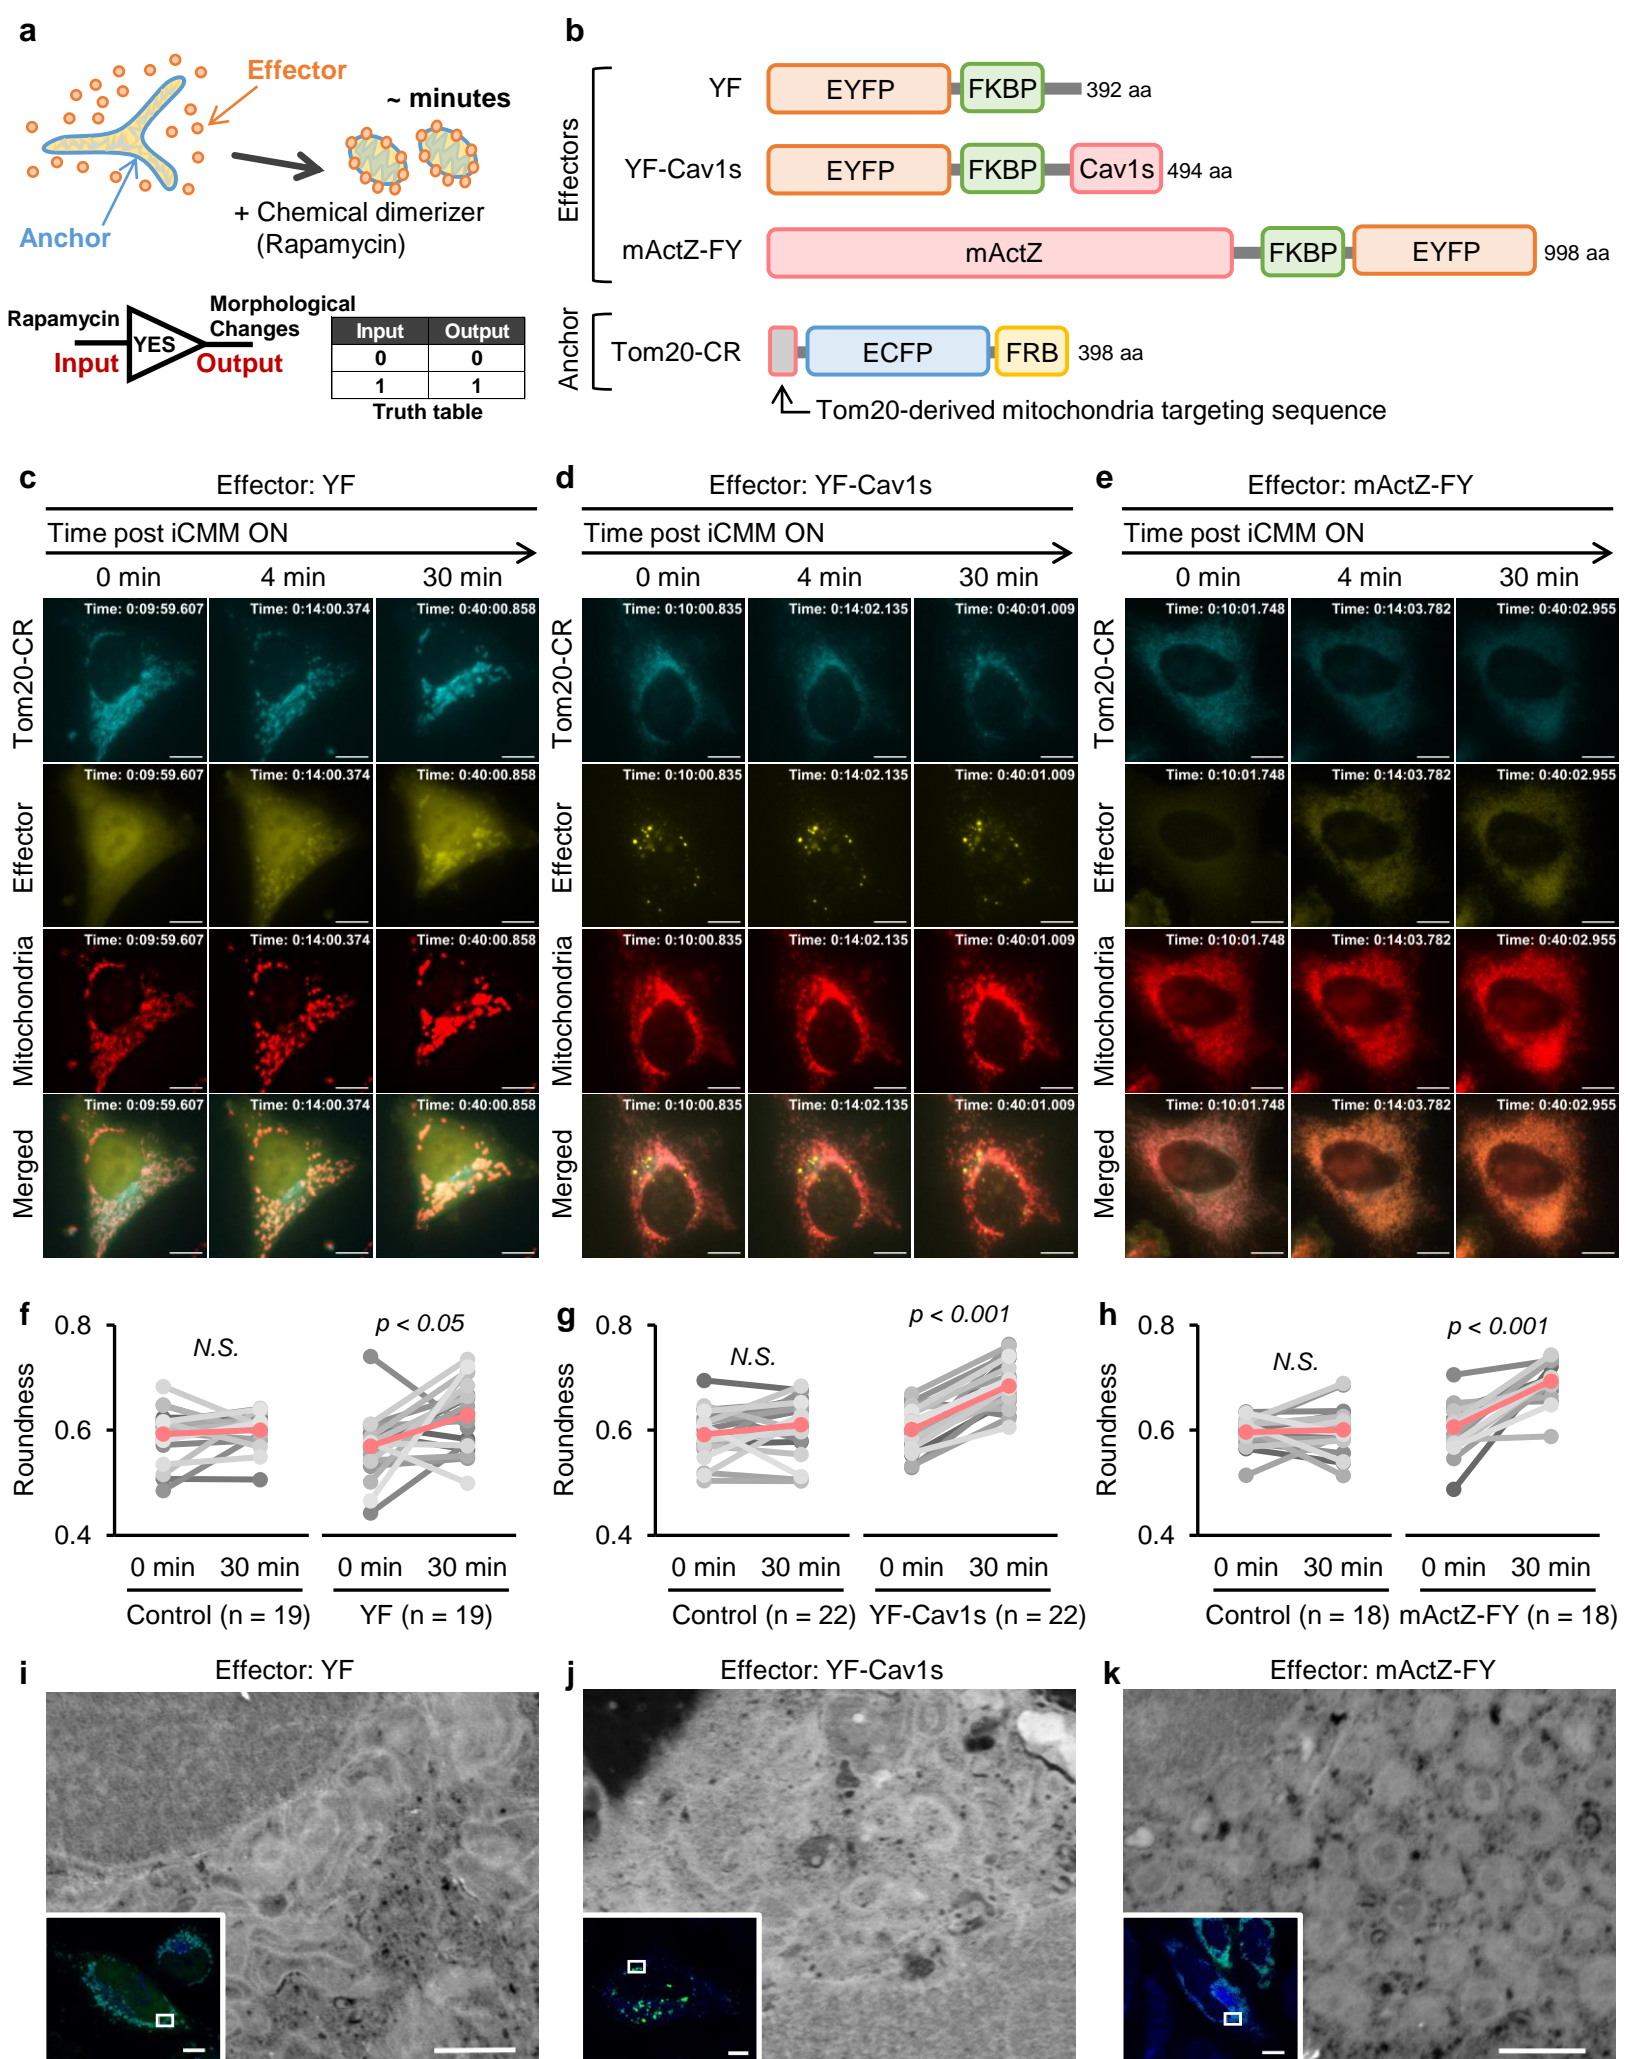

Figure 1. Miyamoto et al.

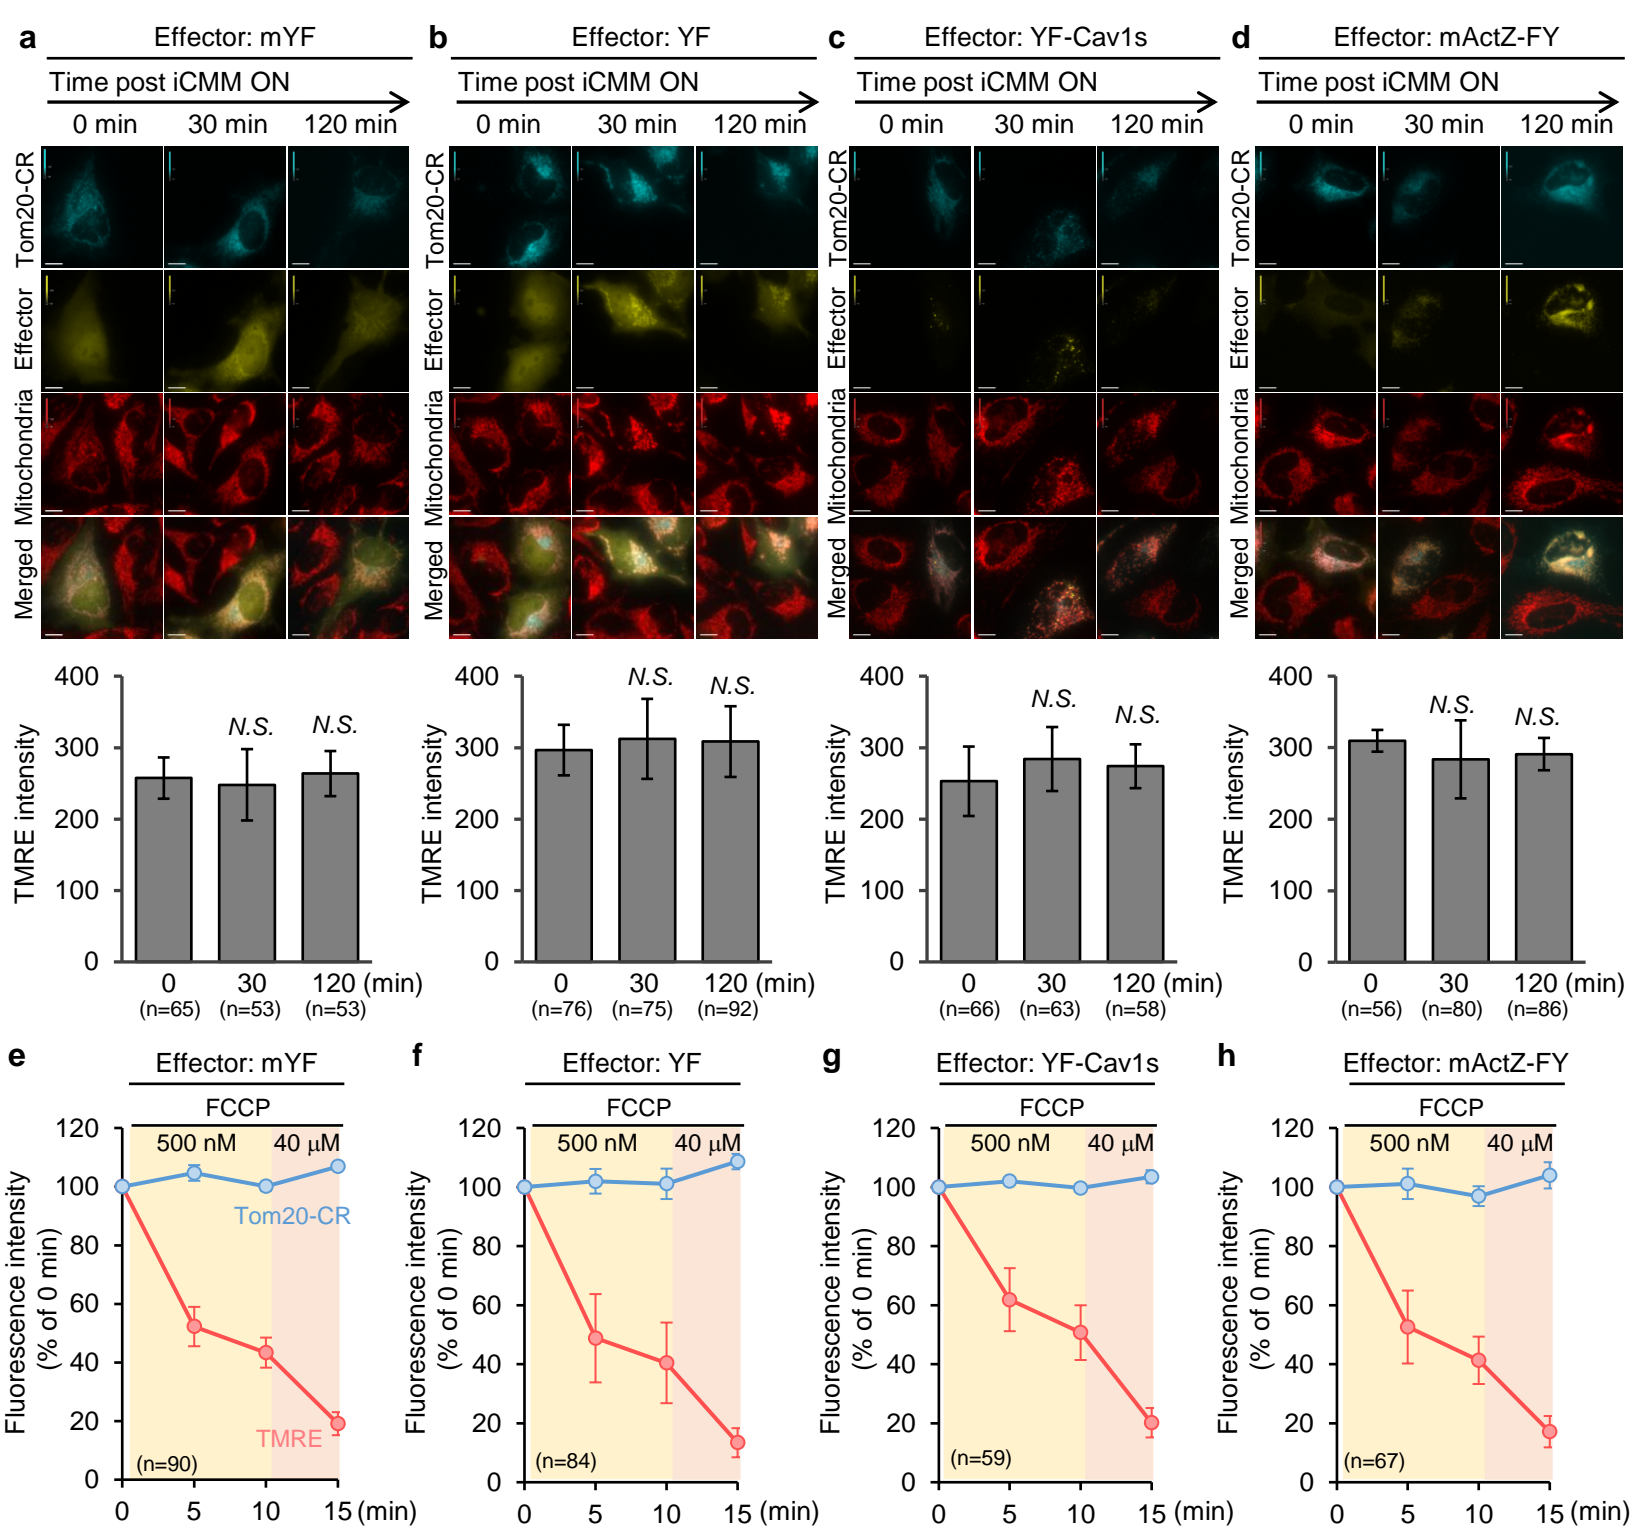

Figure 2. Miyamoto et al.

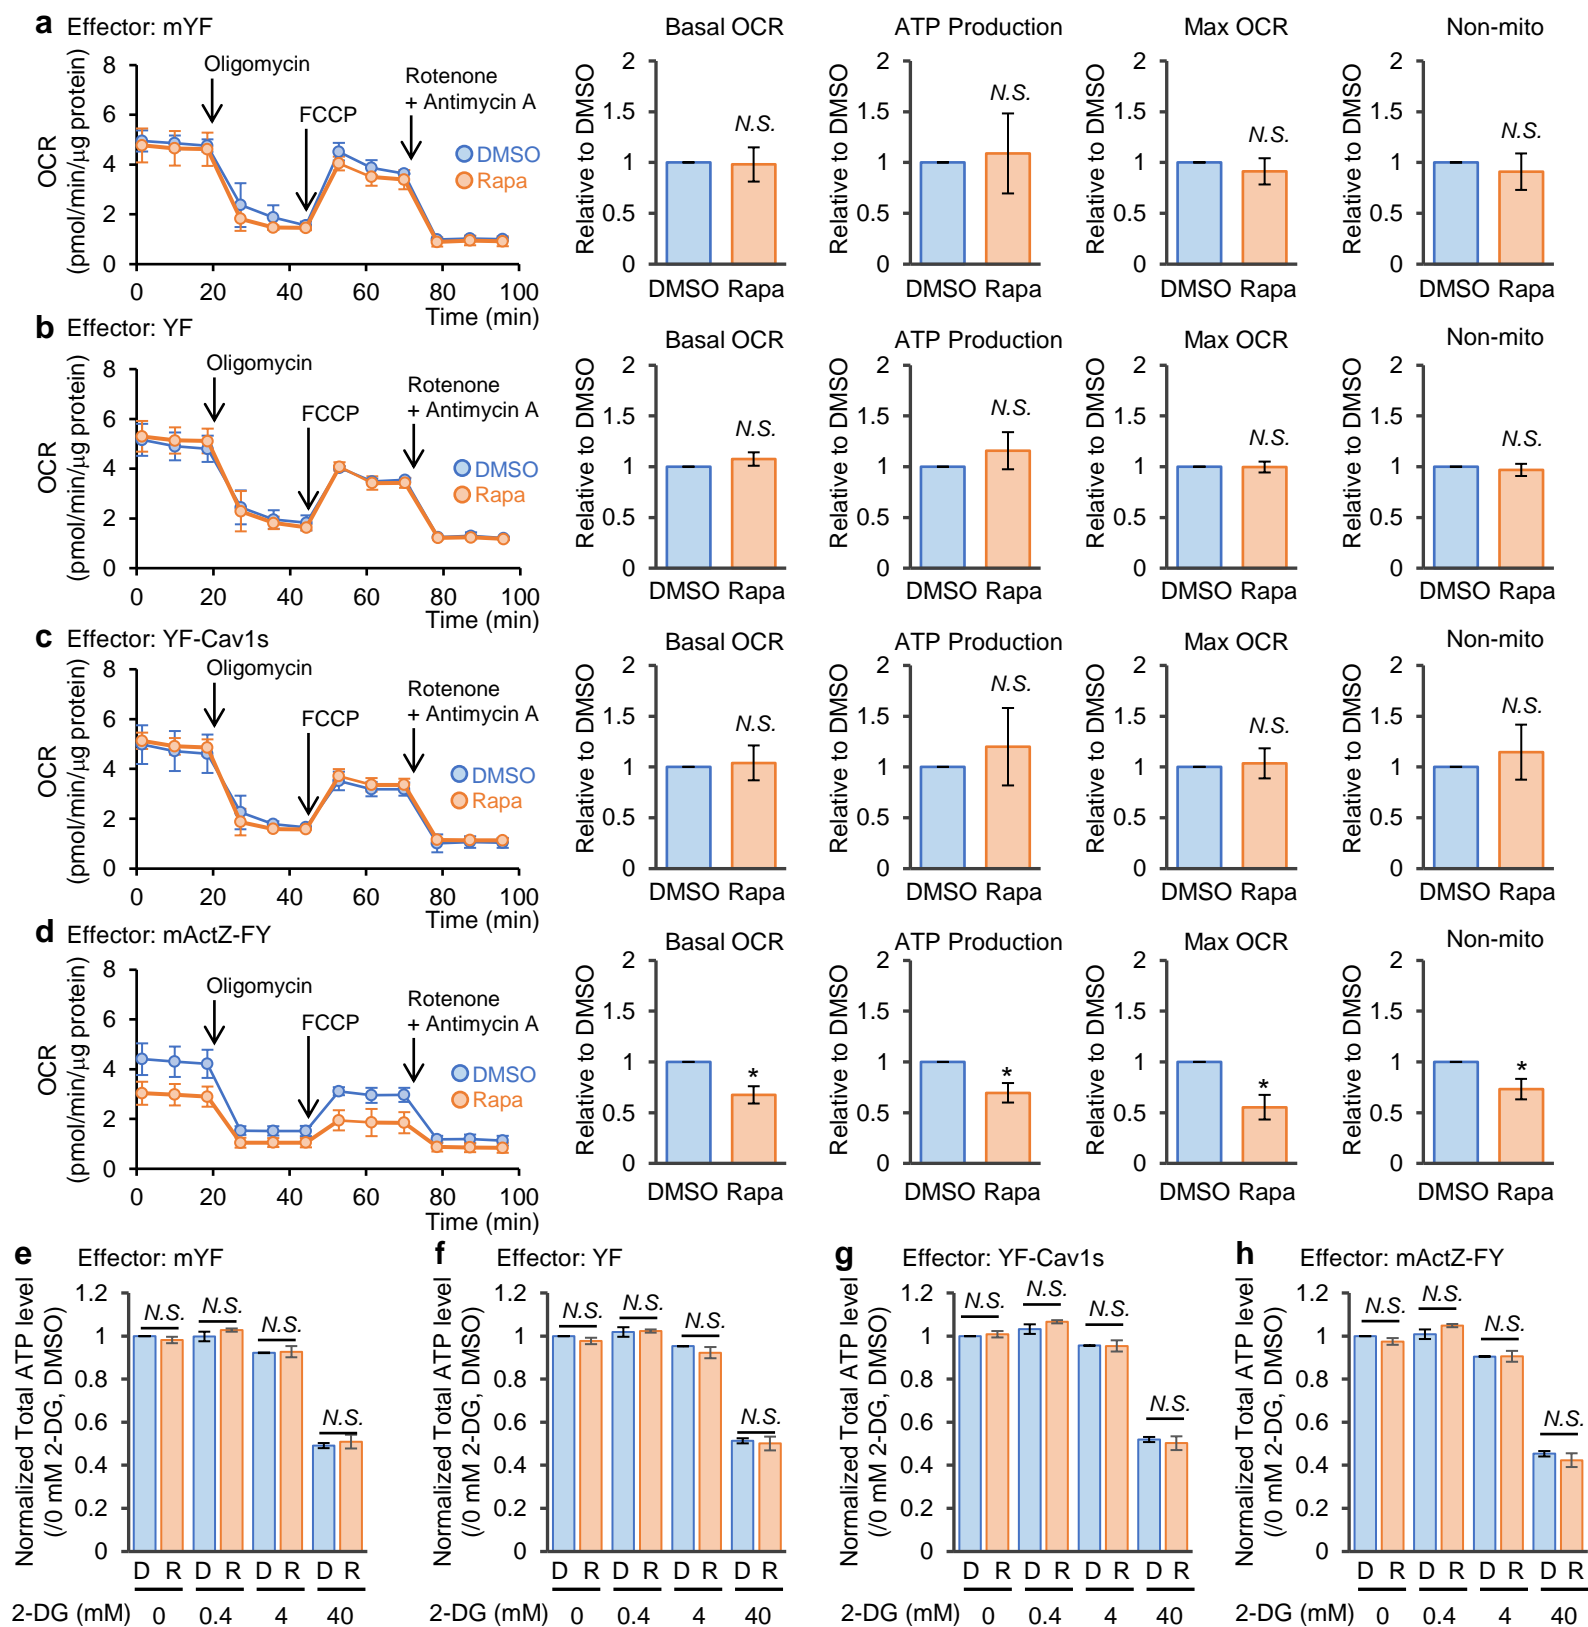

Figure 3. Miyamoto et al.

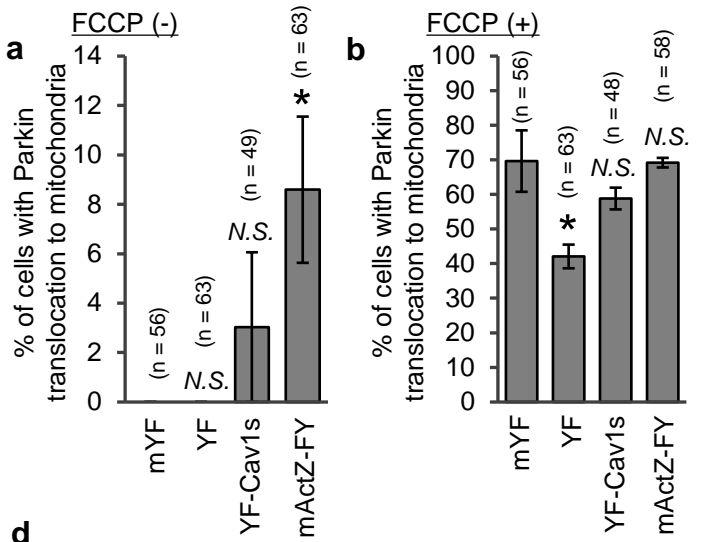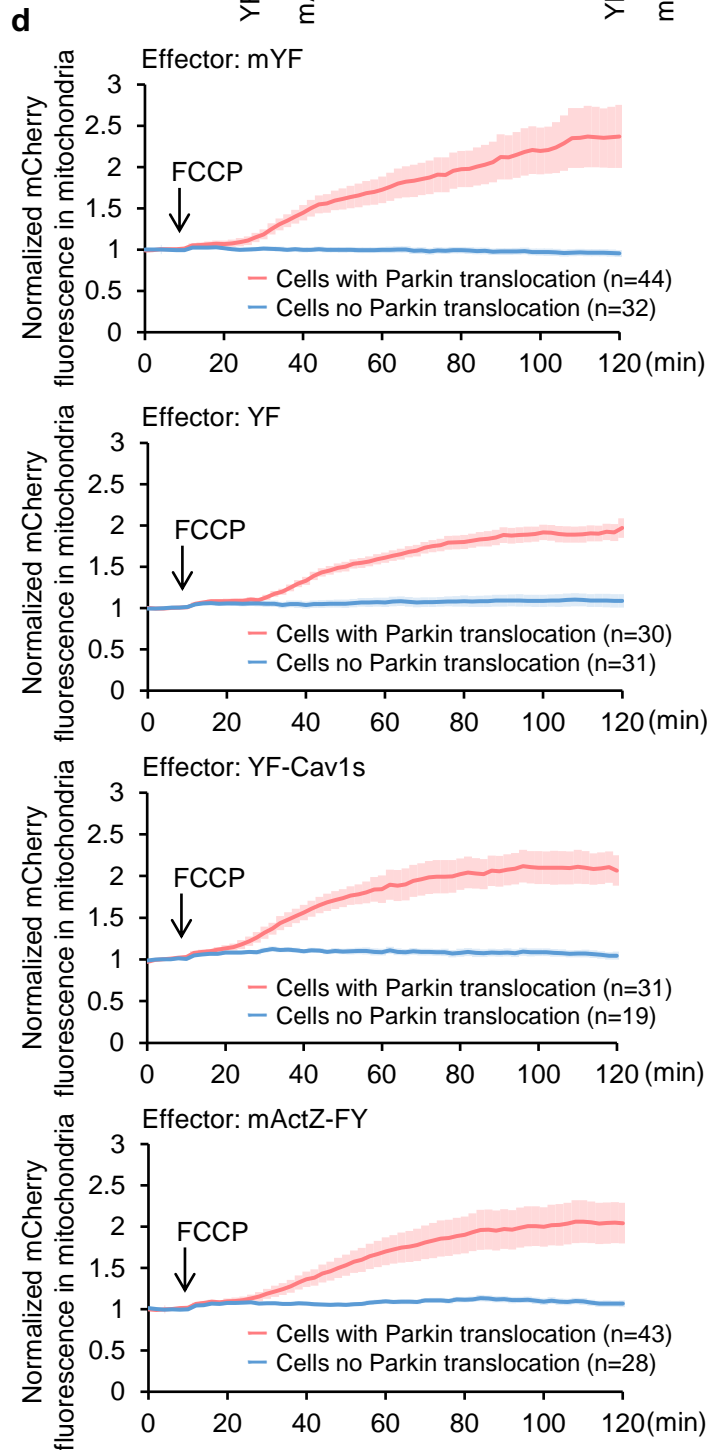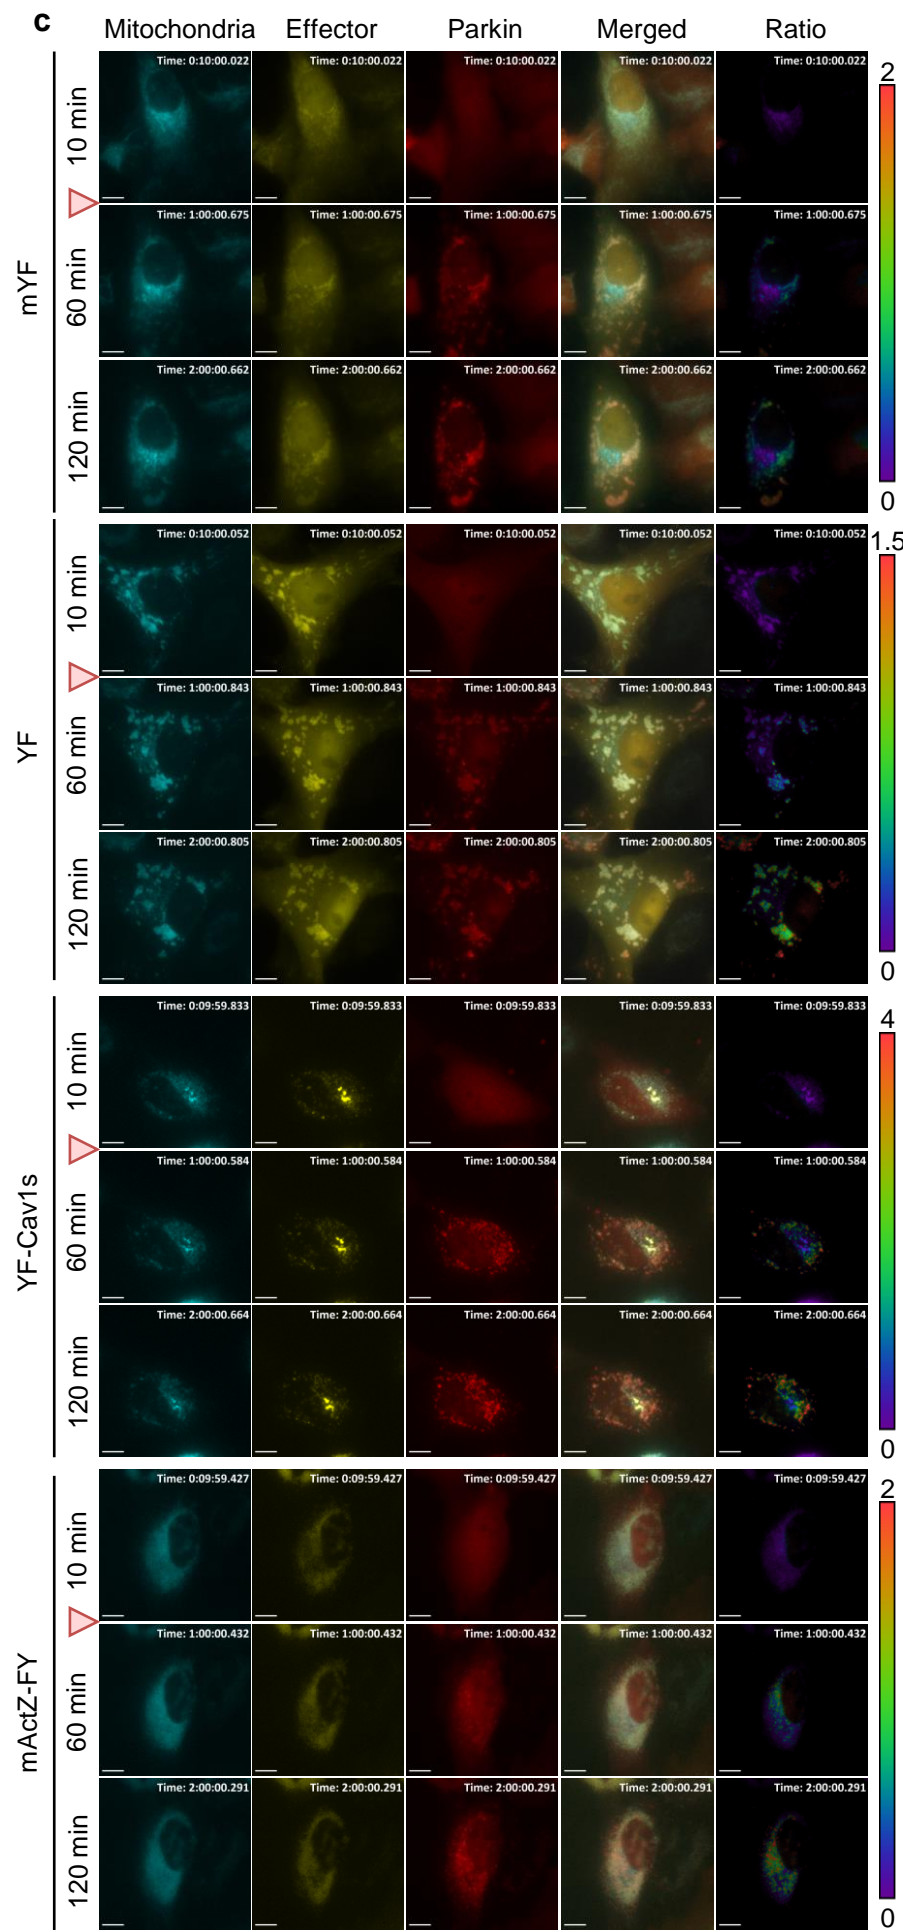

Figure 4. Miyamoto et al.

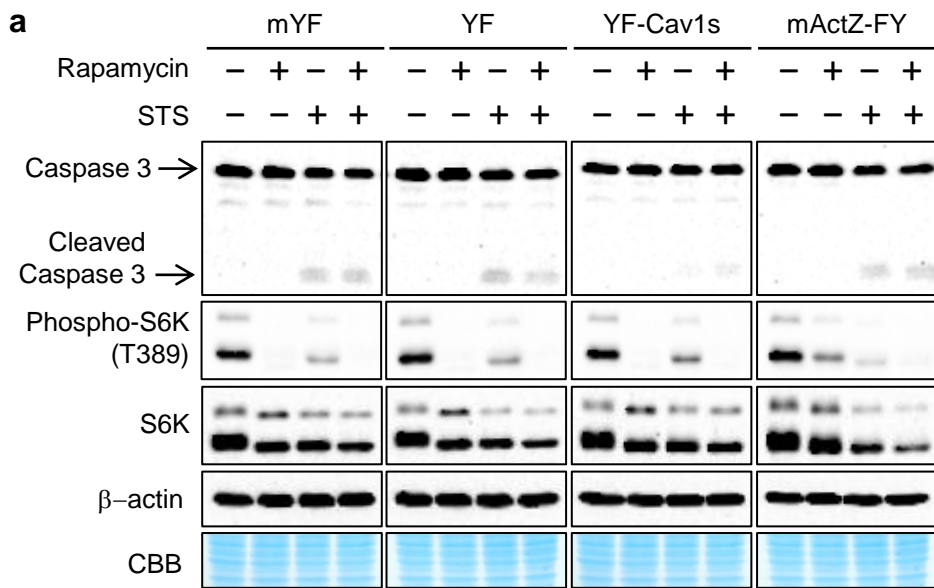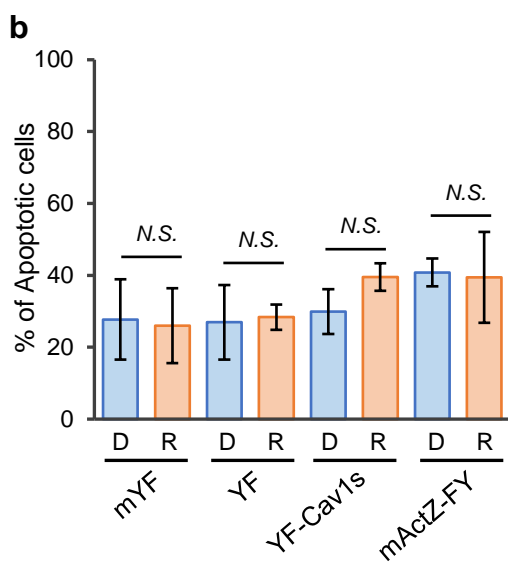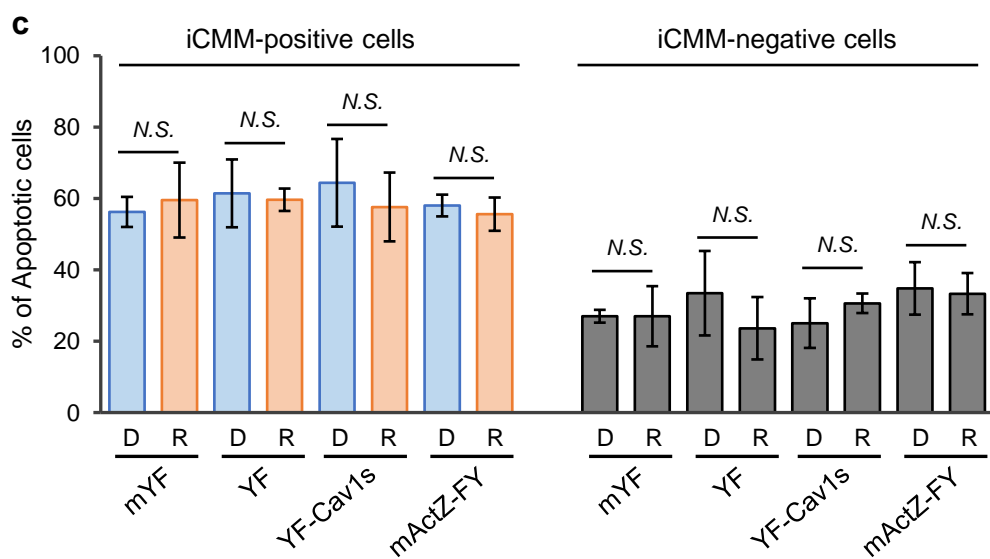

Figure 5. Miyamoto et al.

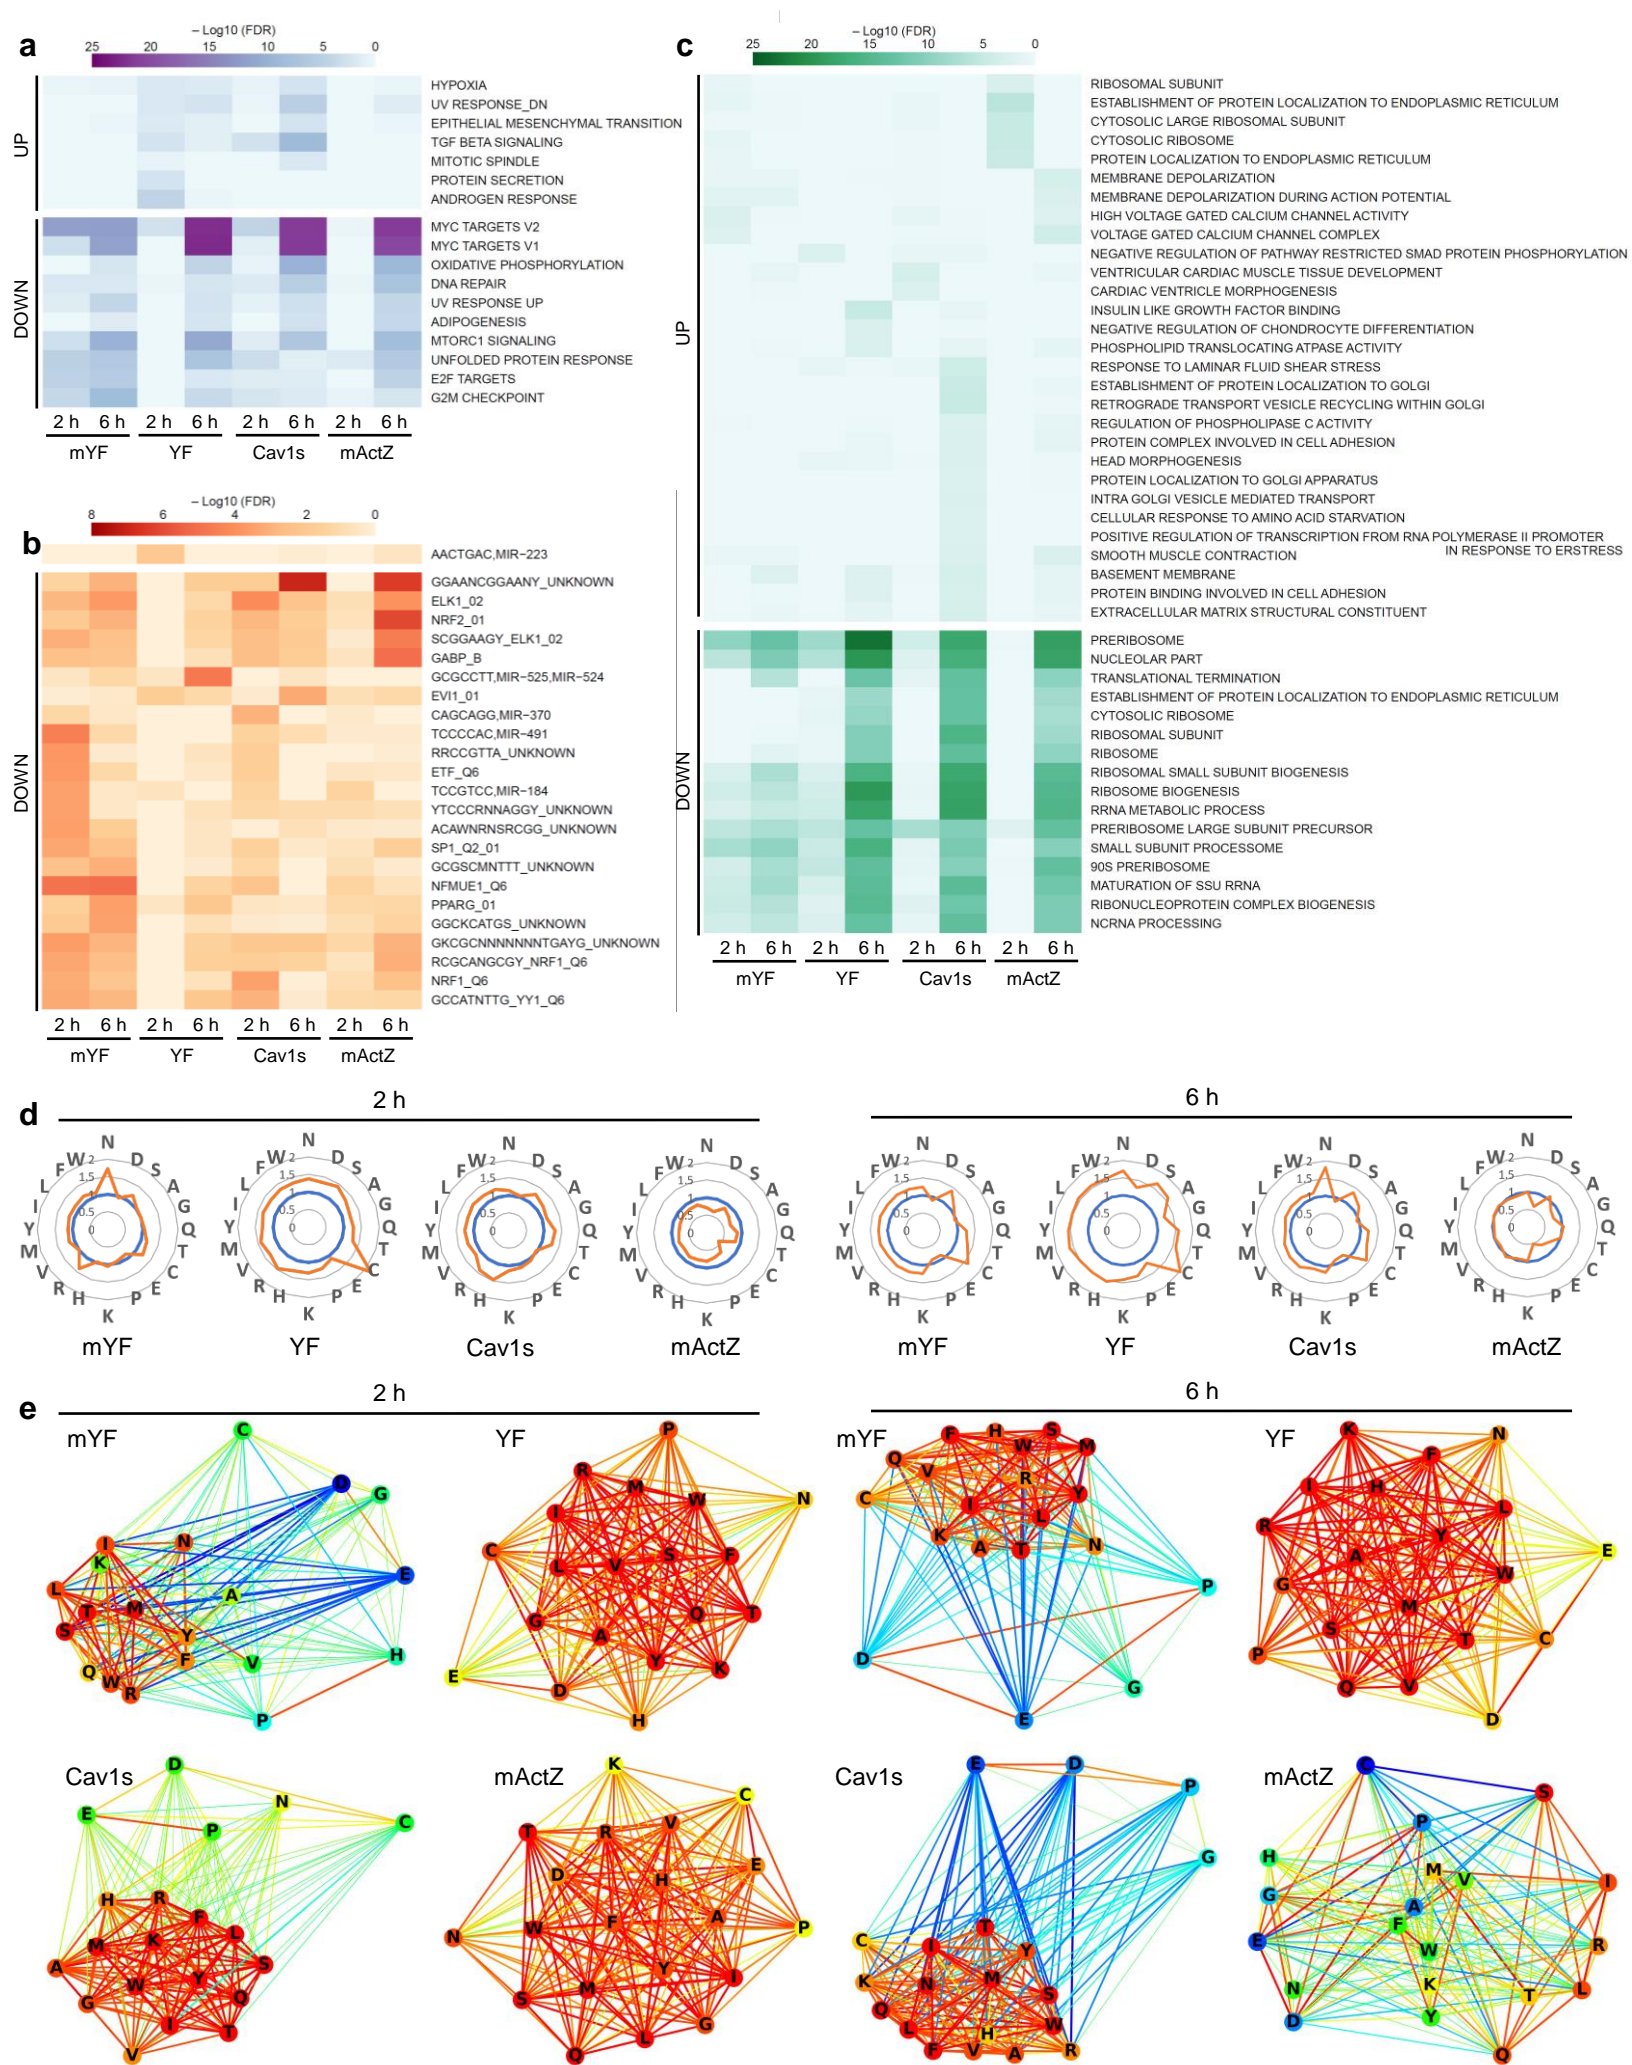

Figure 6. Miyamoto et al.



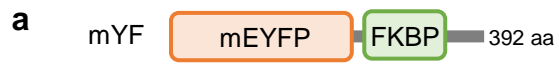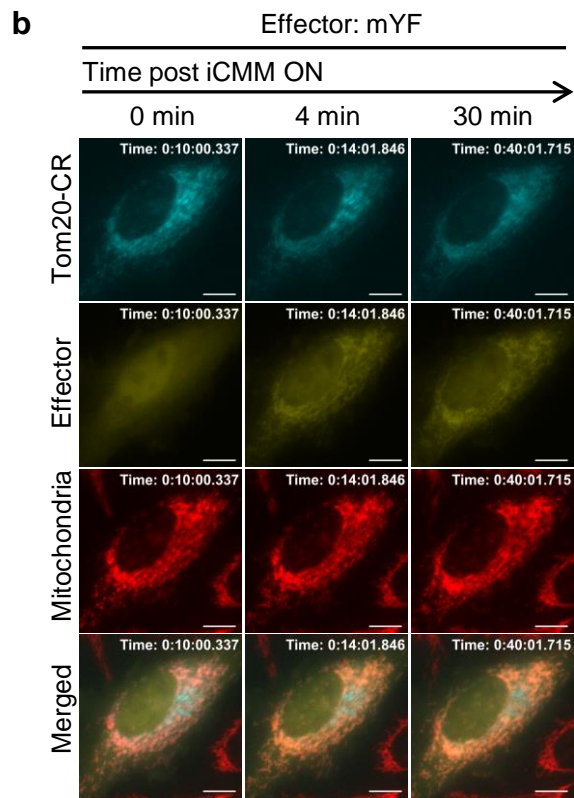

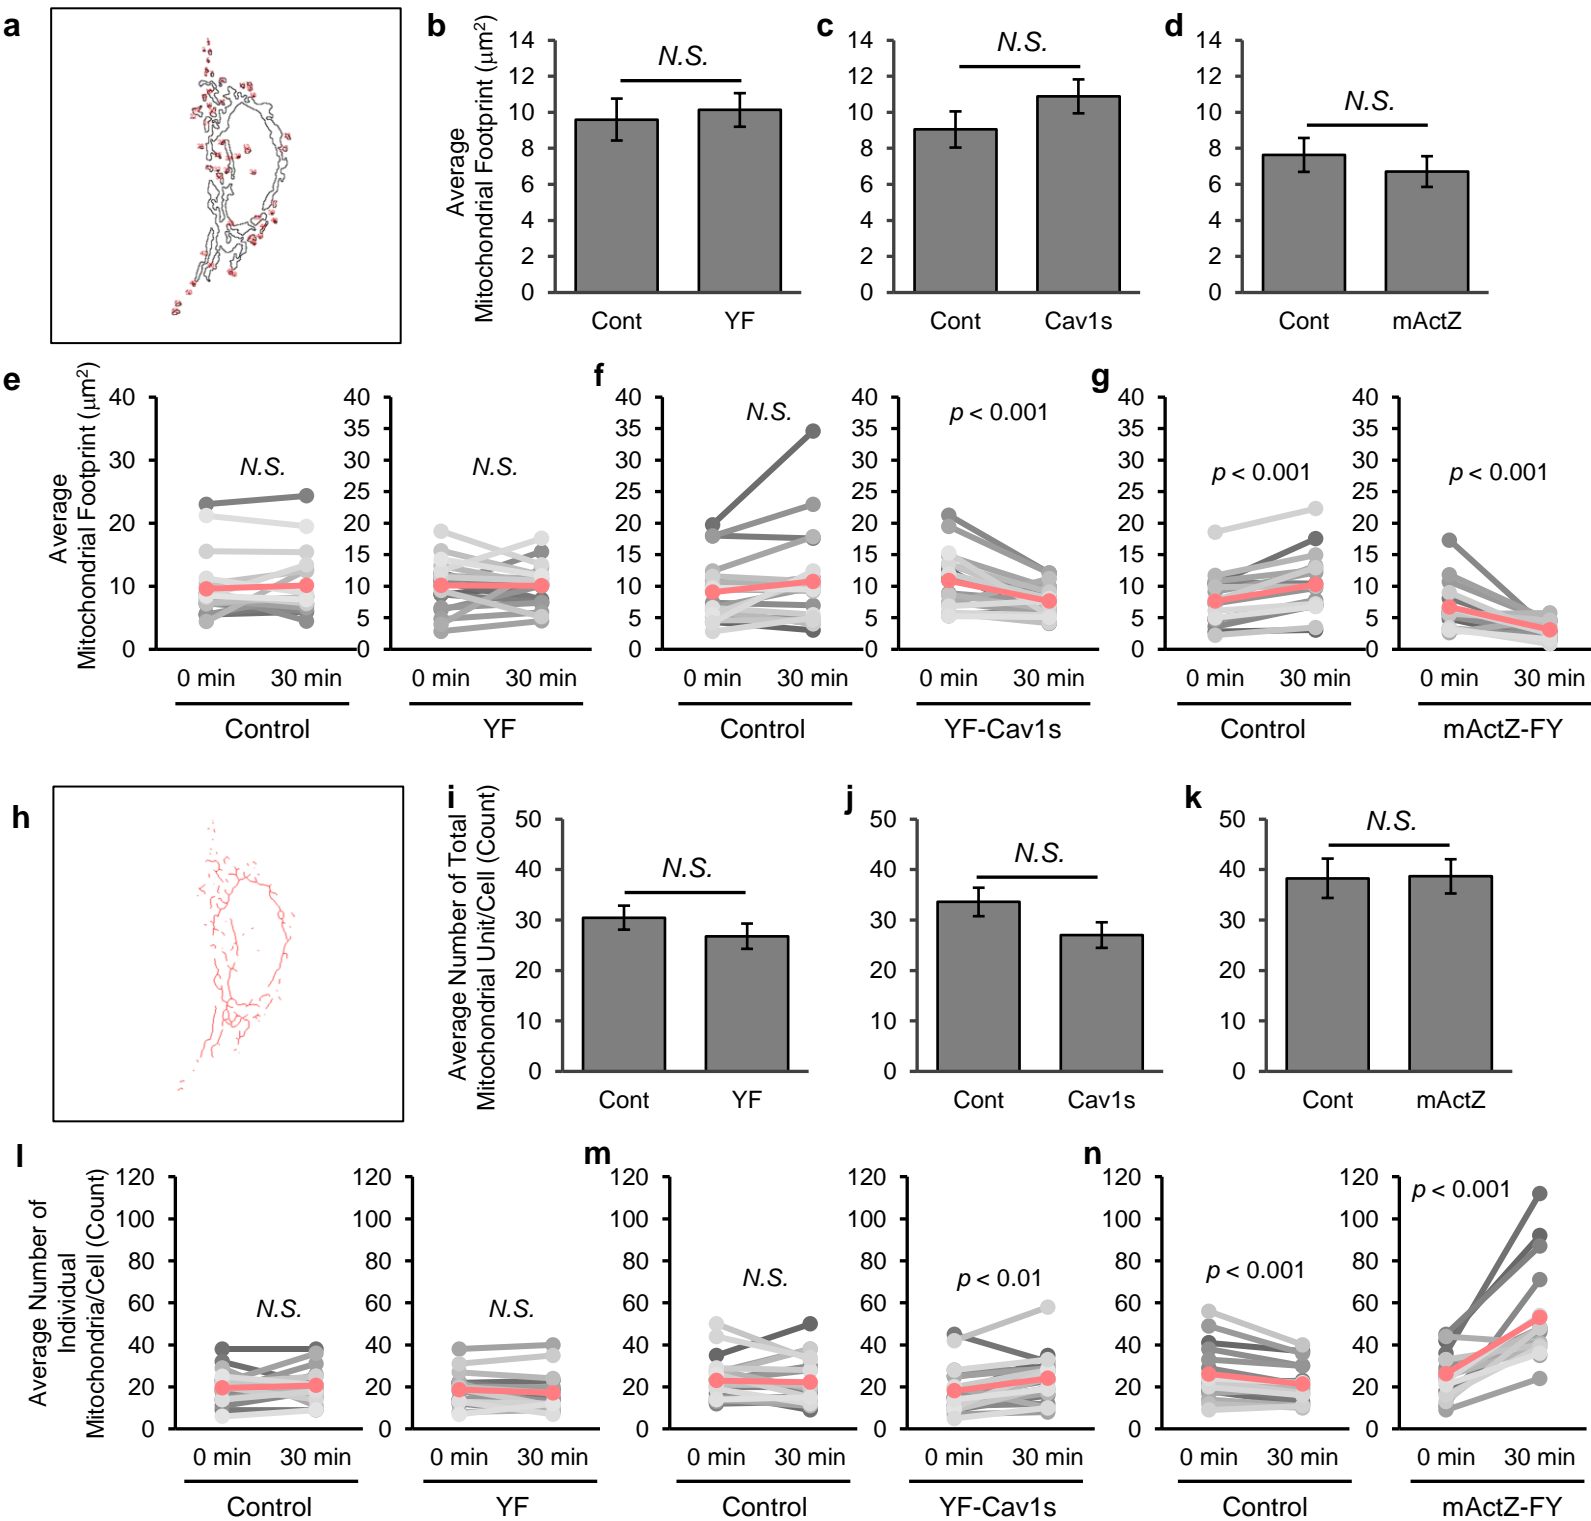

Supplementary Figure 2. Miyamoto et al.

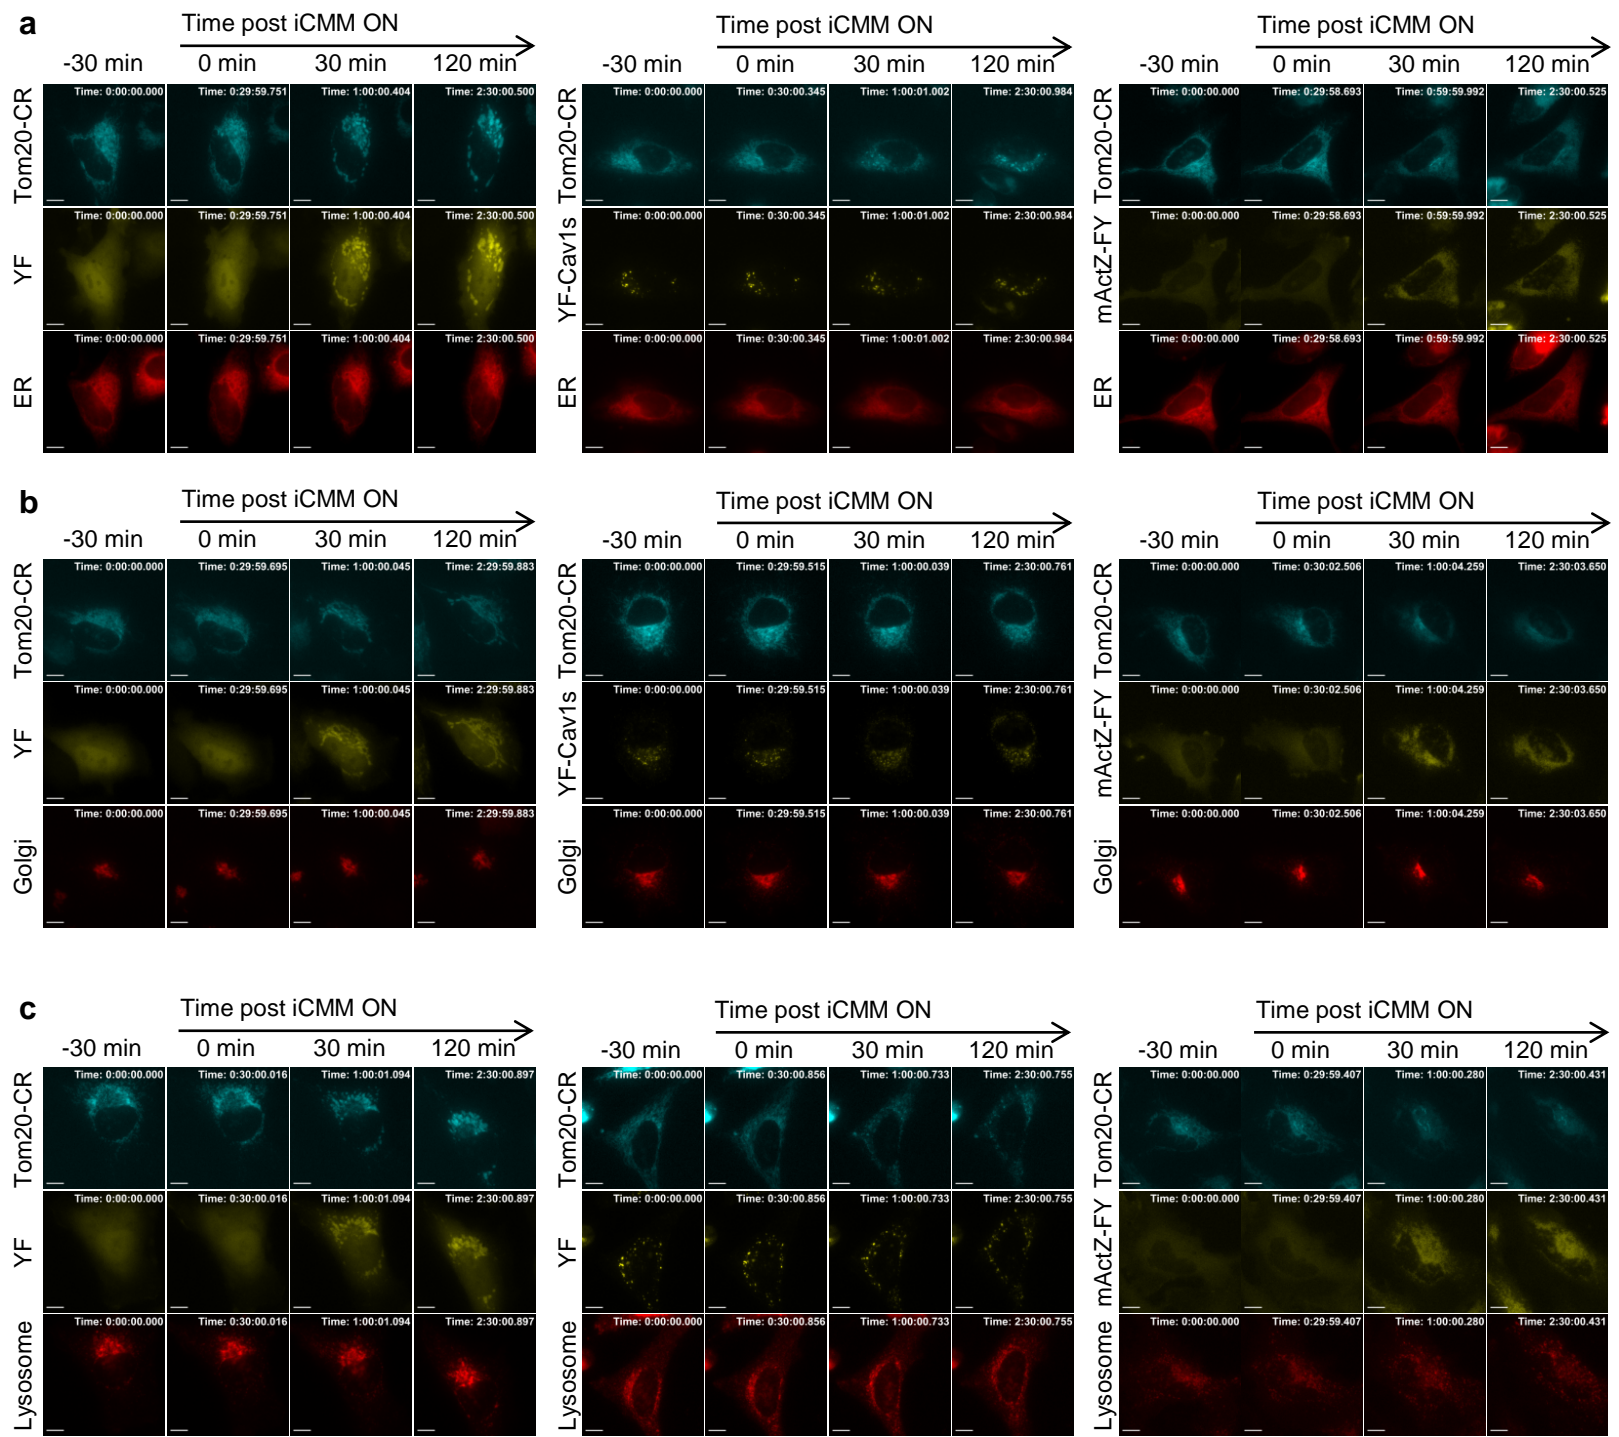

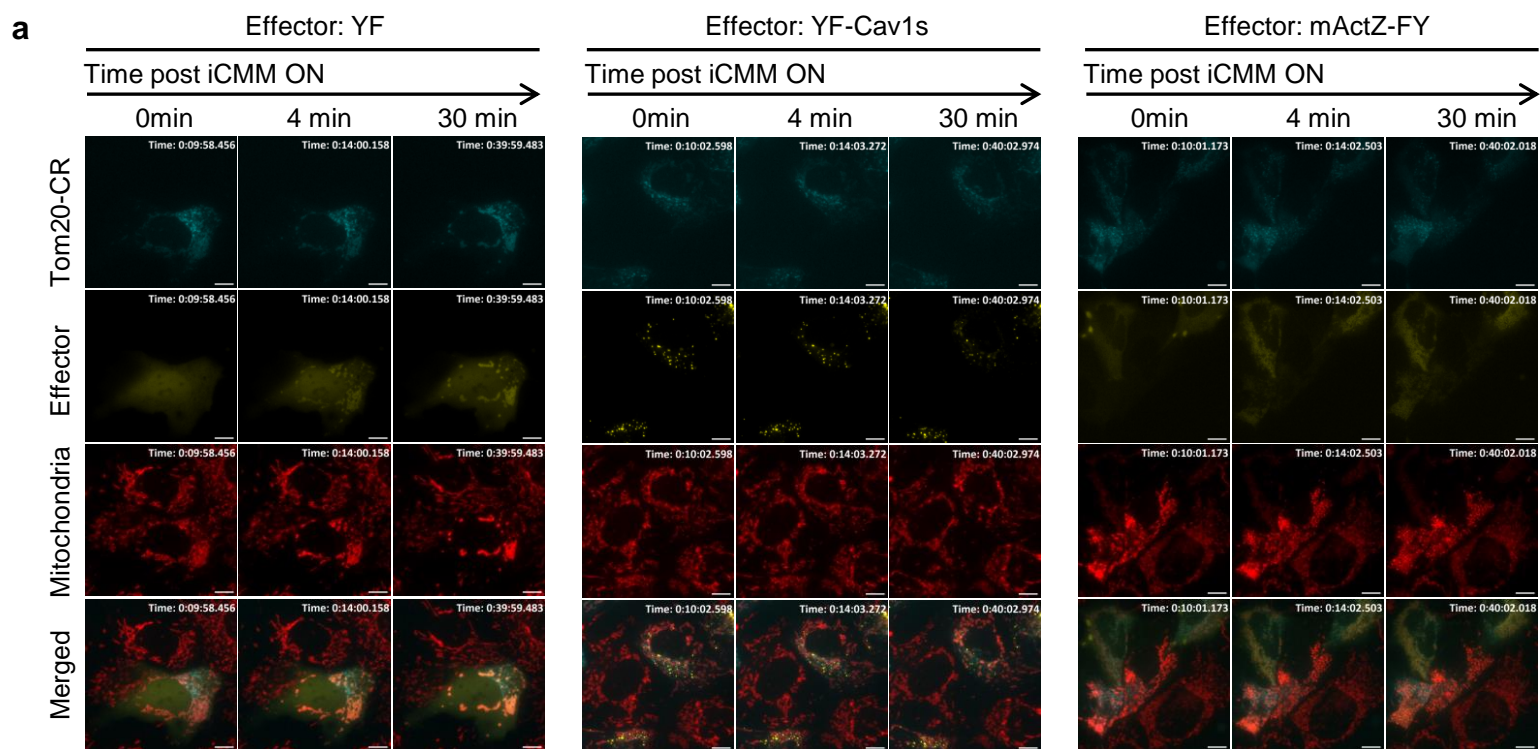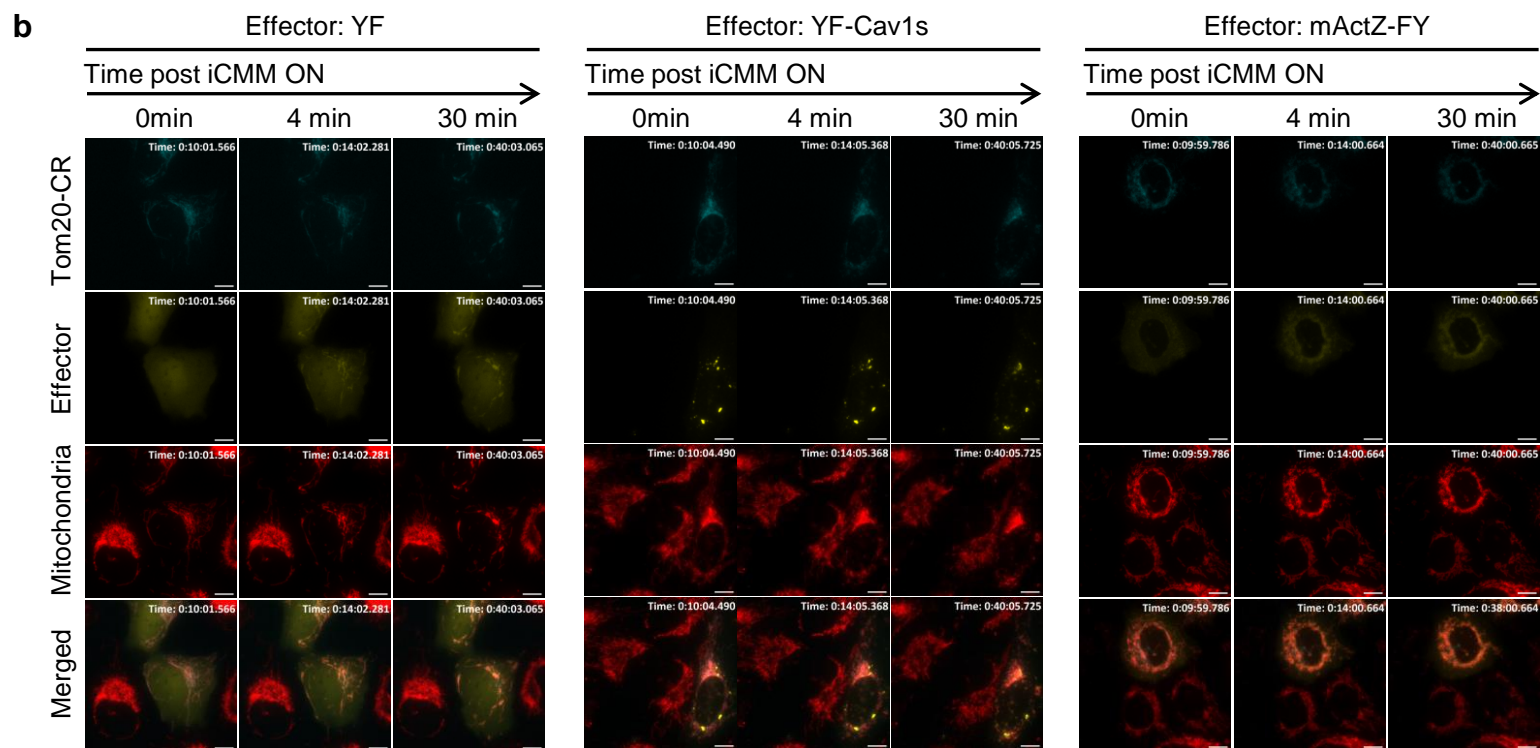

**a**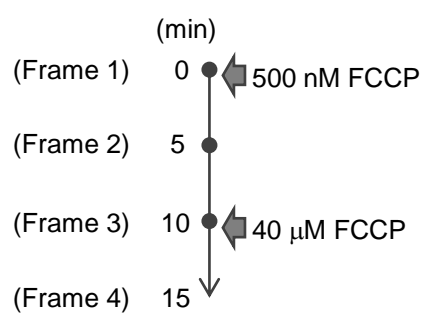**b**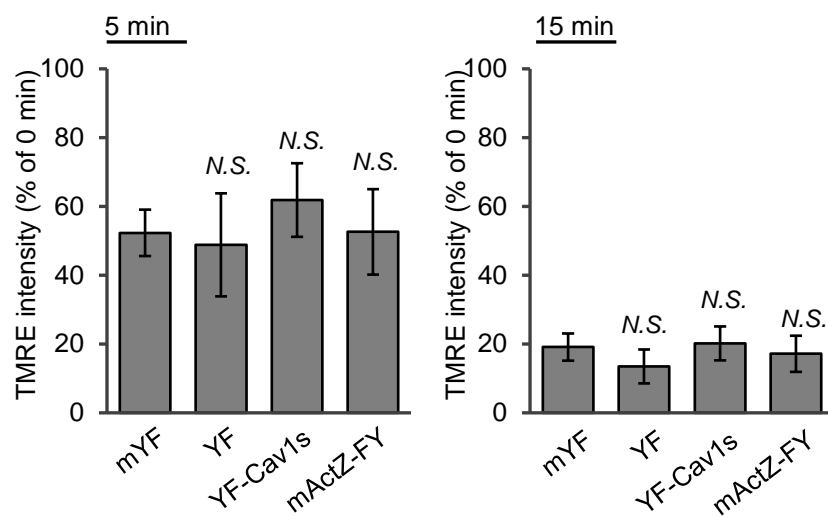

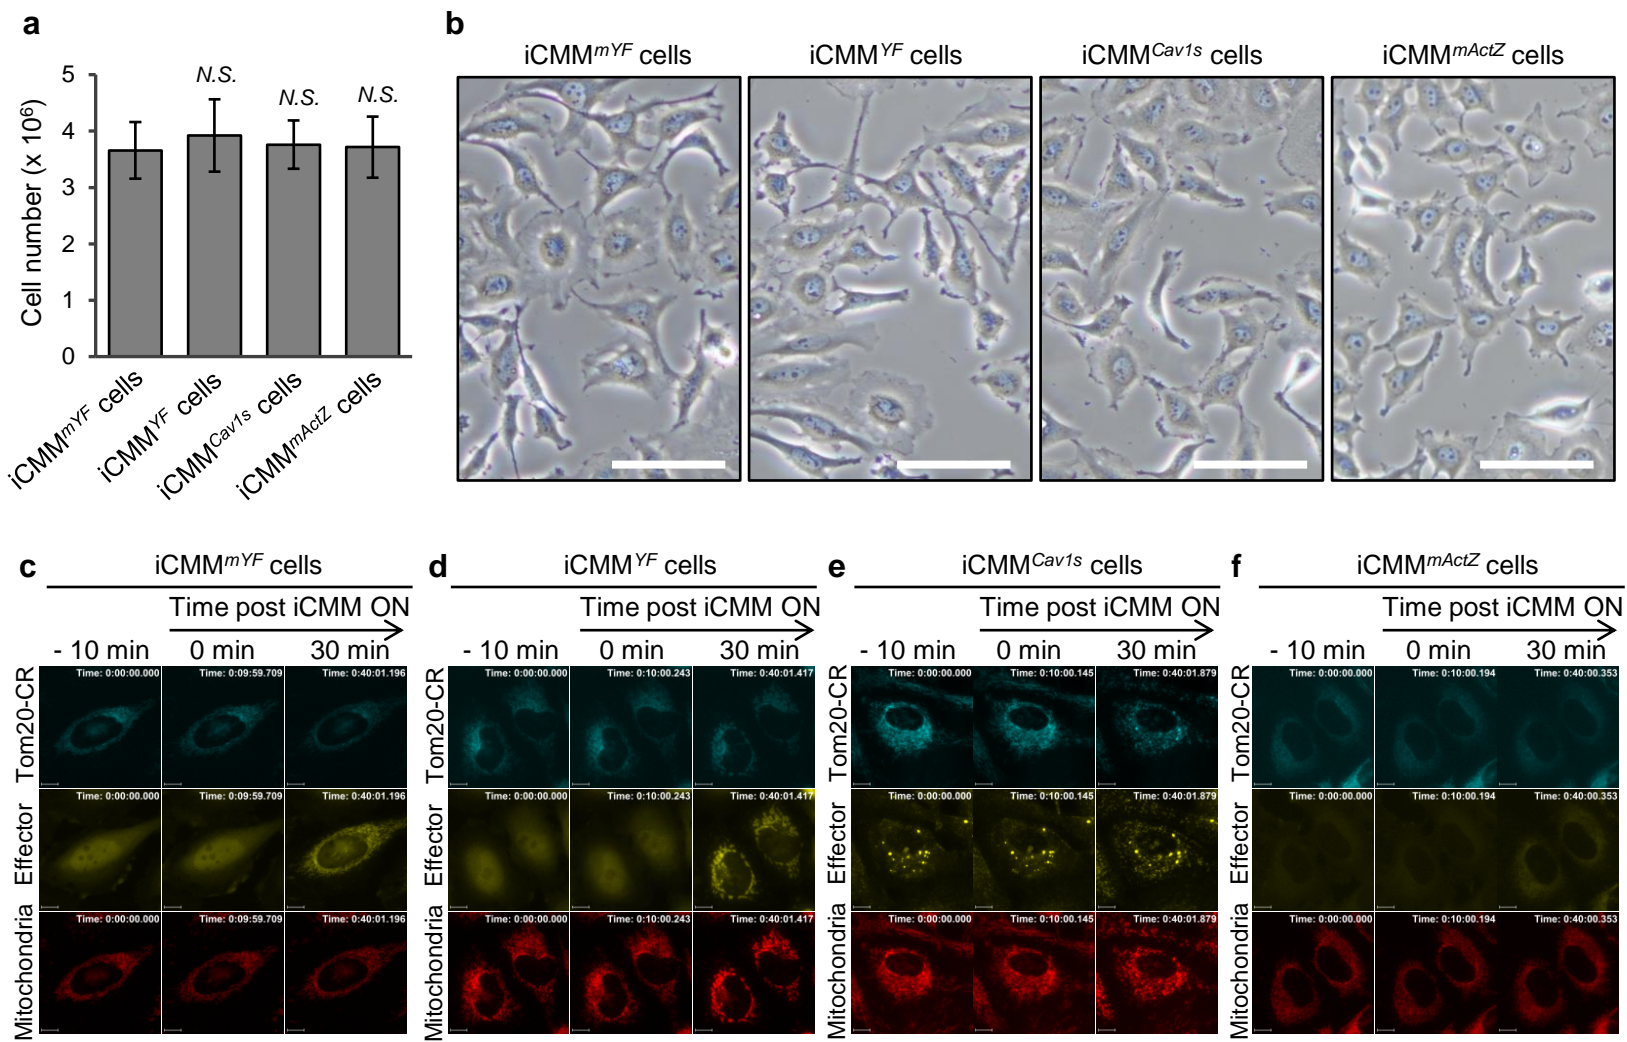

**a** Effector: mYF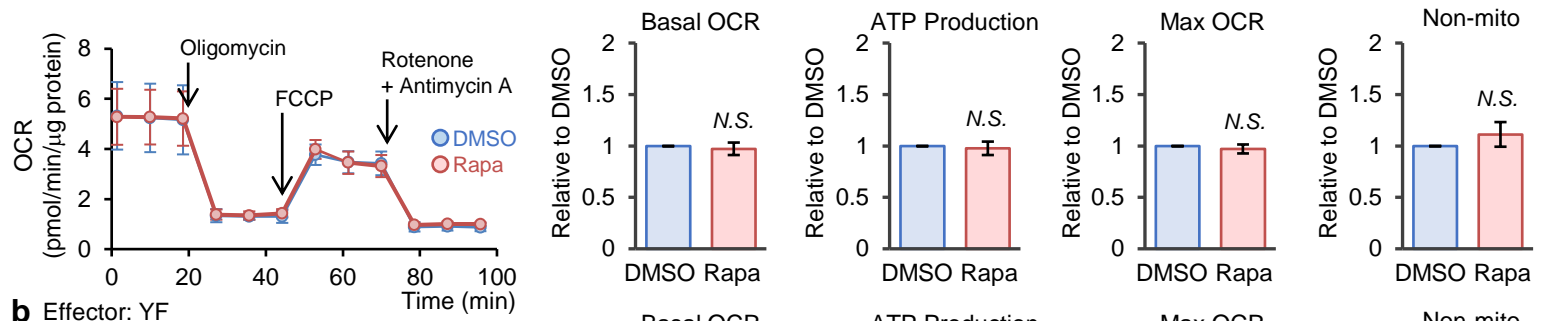**b** Effector: YF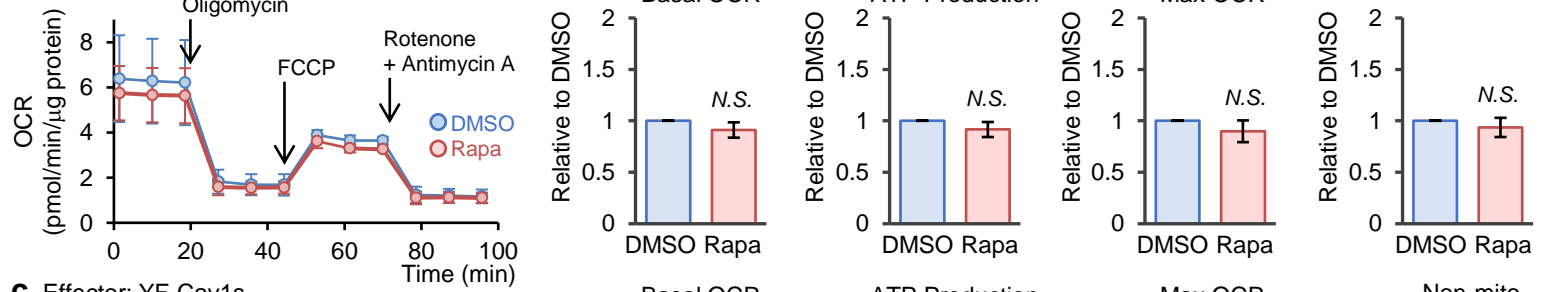**c** Effector: YF-Cav1s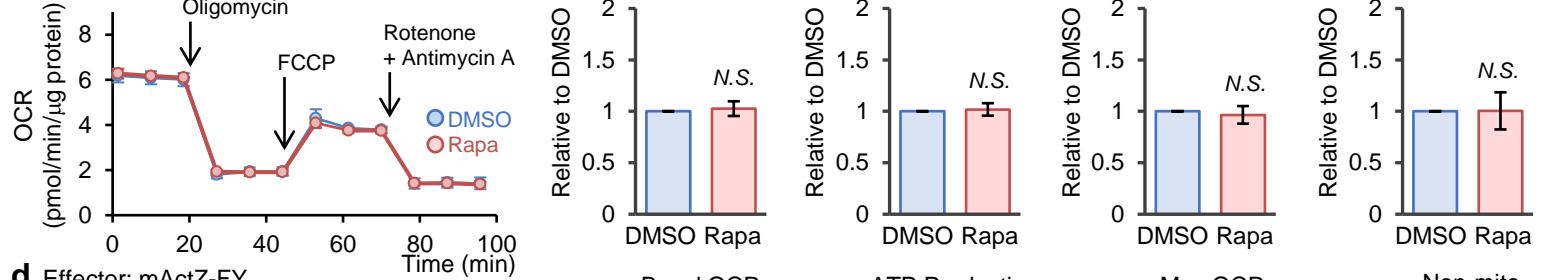**d** Effector: mActZ-FY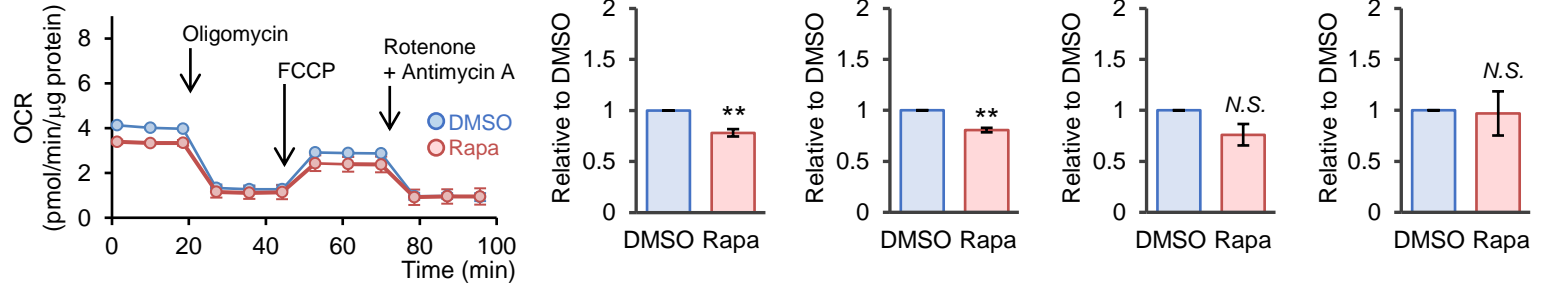

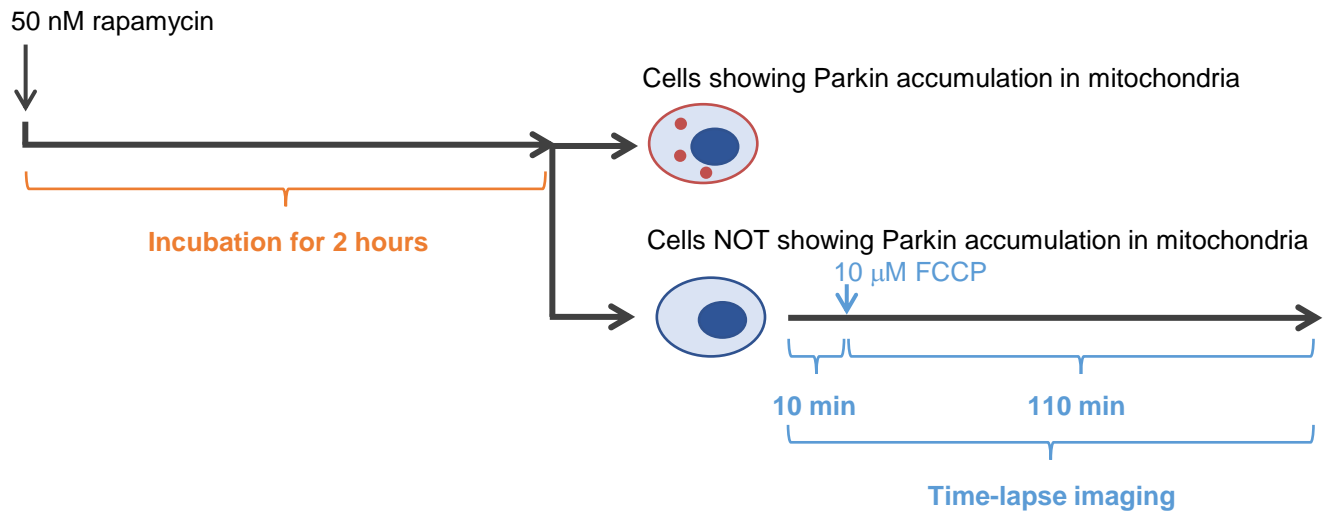



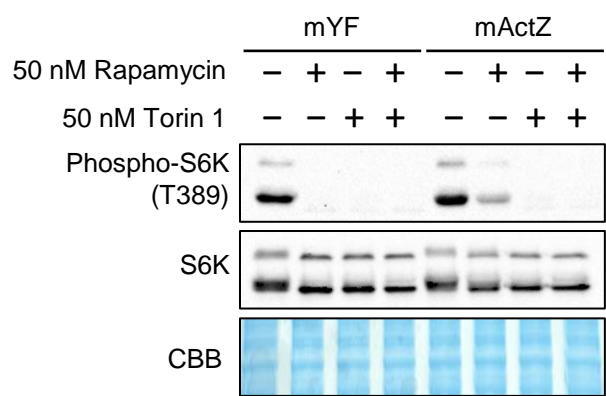

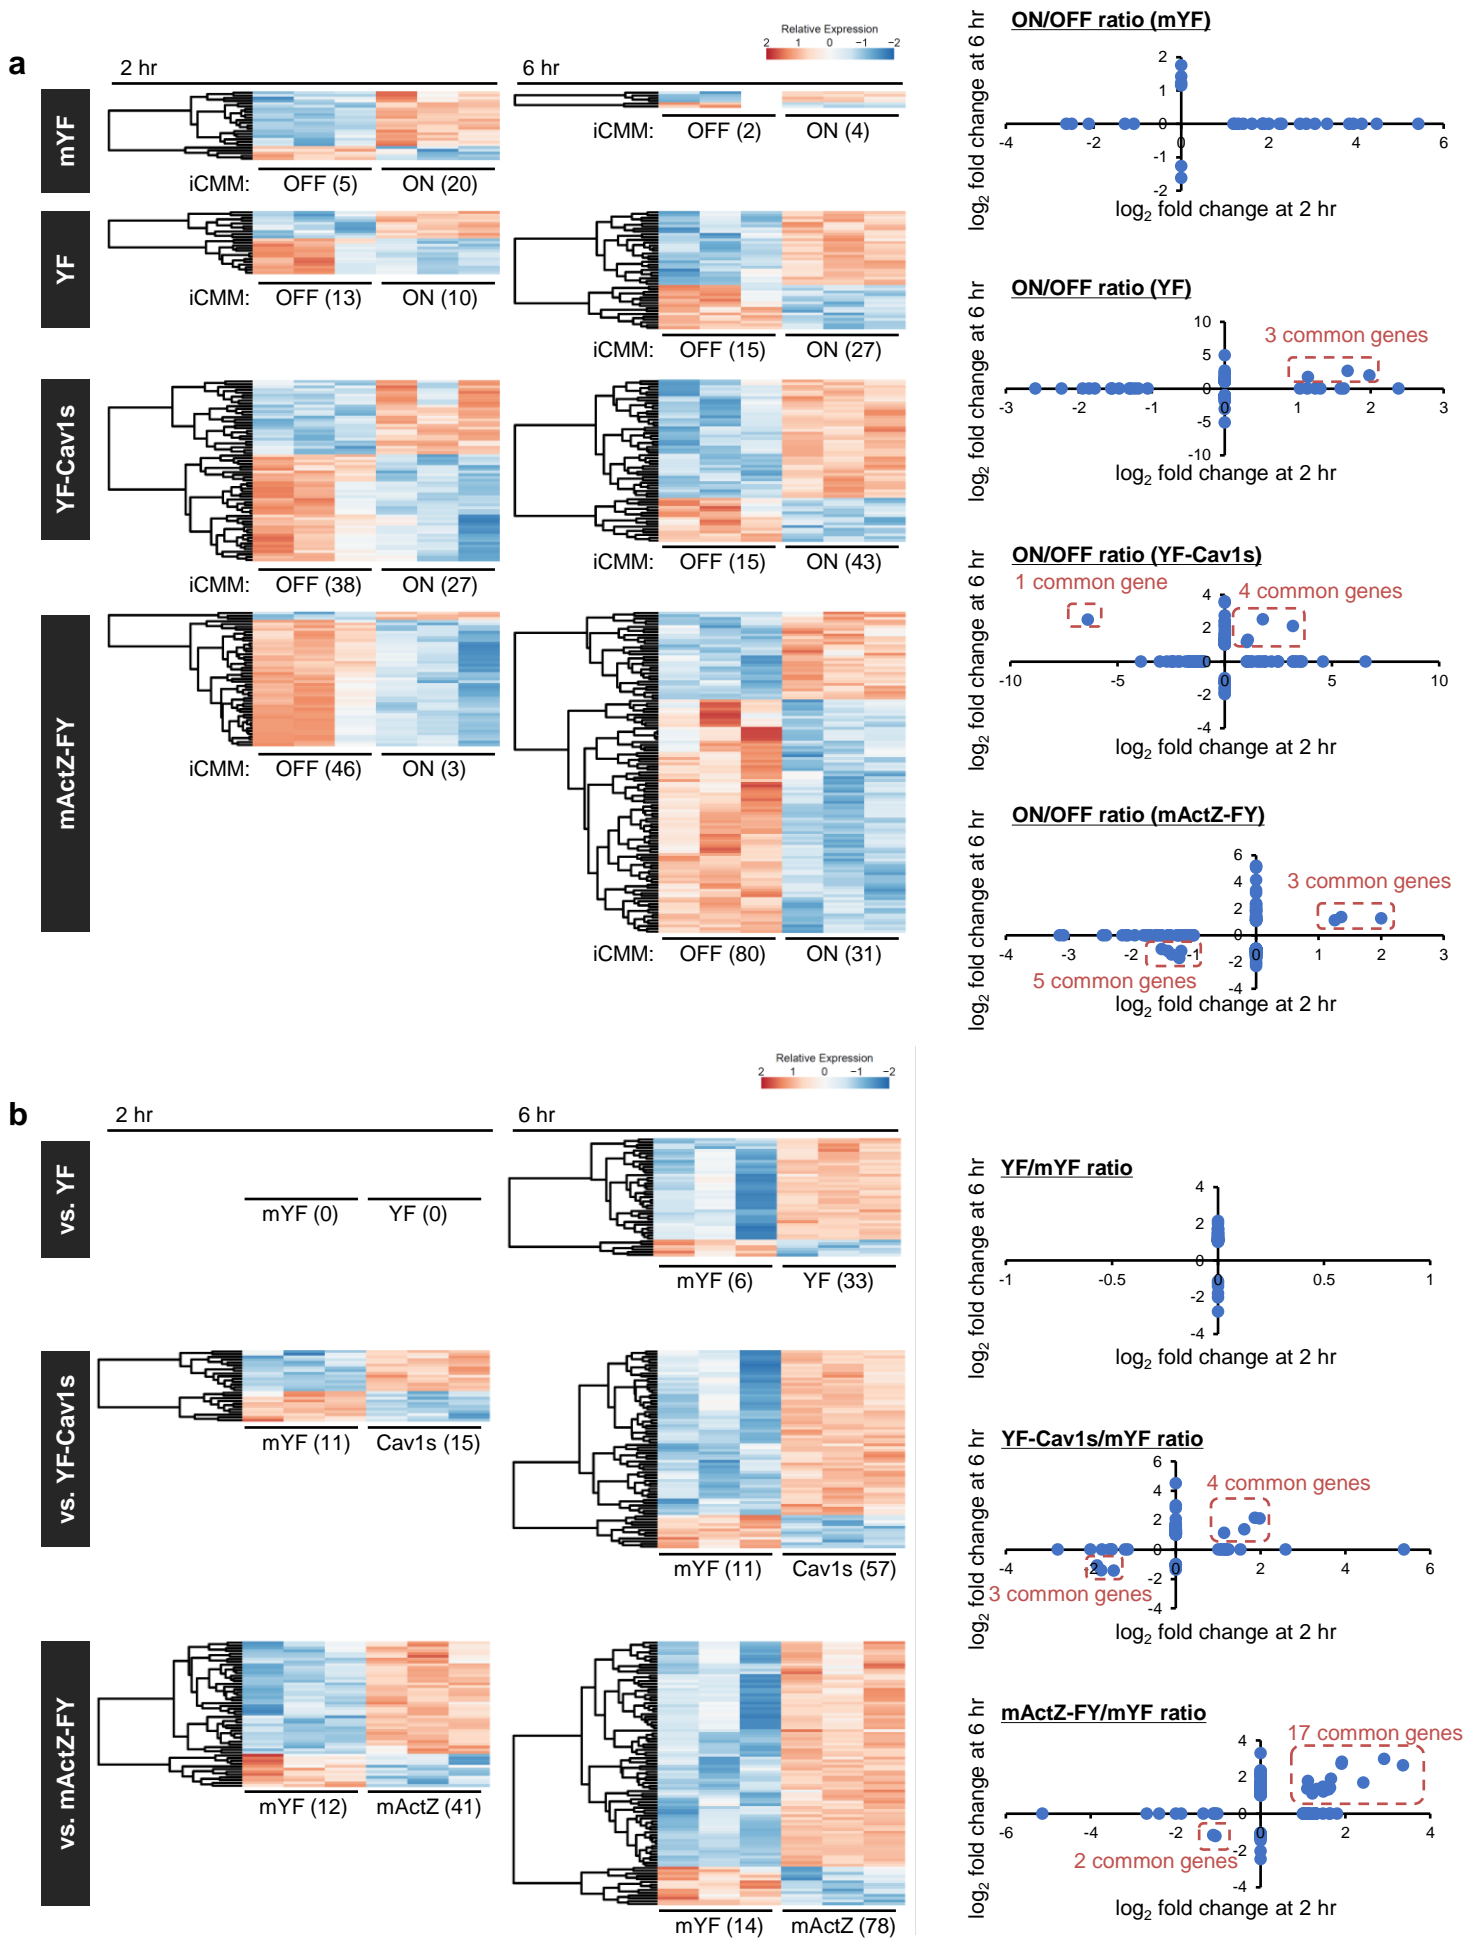

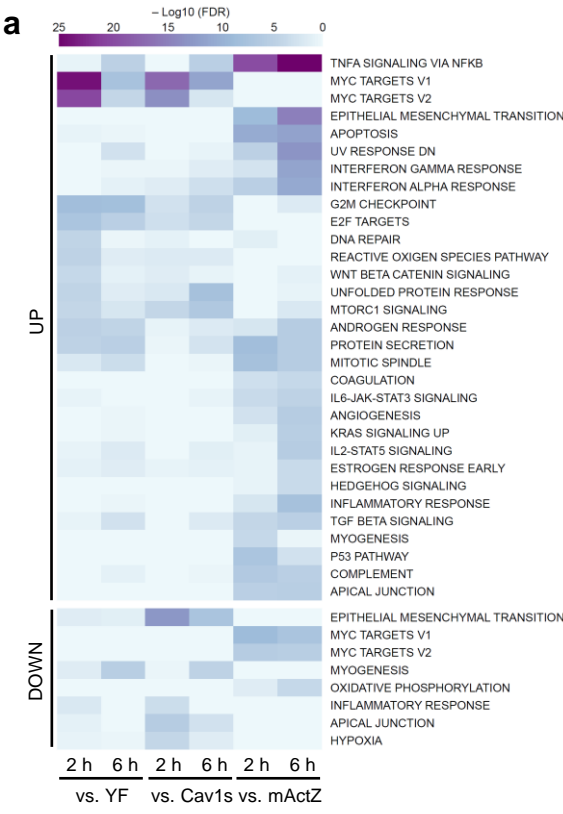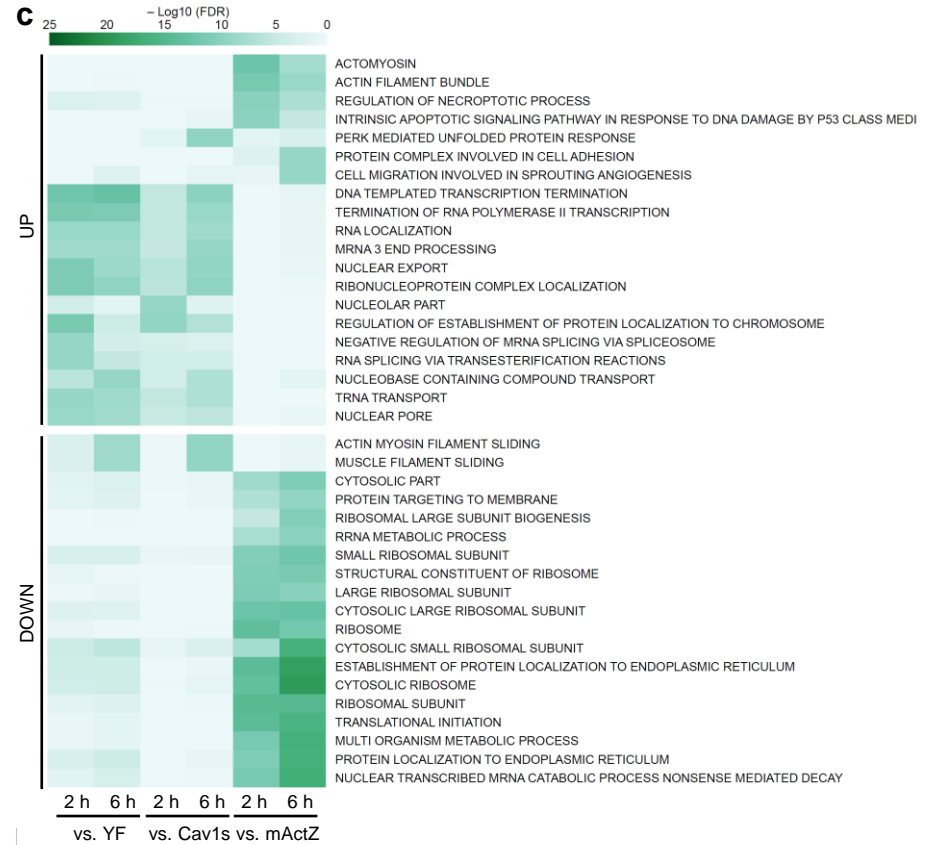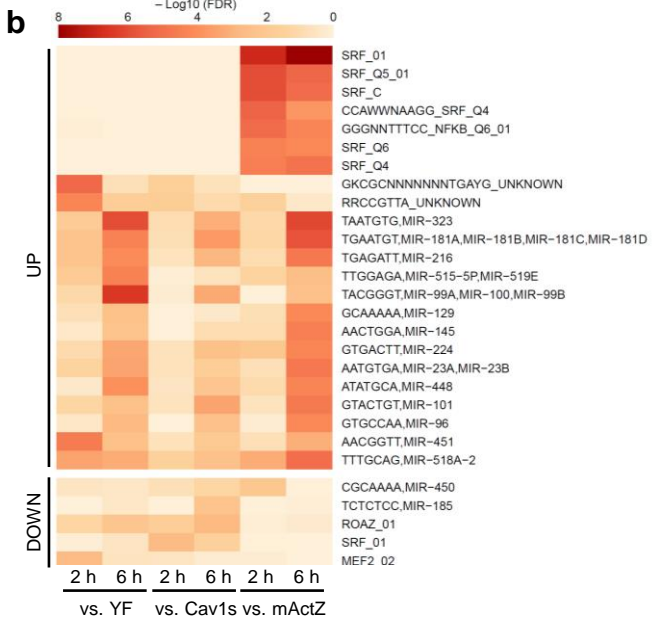

Source: https://biorxiv.org/content/10.1101/2020.06.22.166165v1.full.pdf
